# A highly conserved and globally prevalent cryptic plasmid is among the most numerous mobile genetic elements in the human gut

Emily C Fogarty<sup>1,2,3,\*</sup>, Matthew S Schechter<sup>1,2,3</sup>, Karen Lolans<sup>3</sup>, Madeline L. Sheahan<sup>2,4</sup>, Iva Veseli<sup>3,5</sup>, Ryan Moore<sup>6</sup>, Evan Kiefl<sup>3,5</sup>, Thomas Moody<sup>7</sup>, Phoebe A Rice<sup>1,8</sup>, Michael K Yu<sup>9</sup>, Mark Mimee<sup>1,4,10</sup>, Eugene B Chang<sup>3</sup>, Sandra L Mclellan<sup>11</sup>, Amy D Willis<sup>12</sup>, Laurie E Comstock<sup>2,4</sup>, A Murat Eren<sup>13,14,15,16,\*</sup>

<sup>1</sup>Committee on Microbiology, University of Chicago, Chicago, IL 60637, USA; <sup>2</sup>Duchossois Family Institute, University of Chicago, Chicago, IL 60637, USA; <sup>3</sup>Department of Medicine, University of Chicago, Chicago, IL 60637, USA; <sup>4</sup>Department of Microbiology, University of Chicago, Chicago, IL, 60637, USA; <sup>5</sup>Graduate Program in Biophysical Sciences, University of Chicago, Chicago, IL 60637, USA; <sup>6</sup>Center for Bioinformatics and Computational Biology, University of Delaware, Newark, DE, USA; <sup>7</sup>Department of Systems Biology, Columbia University, New York, NY, 10032 USA; <sup>8</sup>Department of Biochemistry, University of Chicago, Chicago, IL, 60637, USA; <sup>9</sup>Toyota Technological Institute at Chicago; <sup>10</sup>Pritzker School of Molecular Engineering, The University of Chicago, Chicago, IL 60637, USA; <sup>11</sup>School of Freshwater Sciences, University of Wisconsin-Milwaukee, Milwaukee, WI, 53204, USA; <sup>12</sup>Department of Biostatistics, University of Washington, Seattle, WA, 98195, USA; <sup>13</sup>Marine Biological Laboratory, Woods Hole, MA, 02543, USA; <sup>14</sup>Alfred Wegener Institute, Helmholtz Centre for Polar and Marine Research, 27570 Bremerhaven, Germany. <sup>15</sup>Institute for Chemistry and Biology of the Marine Environment, University of Oldenburg, 26129 Oldenburg, Germany; <sup>16</sup>Helmholtz Institute for Functional Marine Biodiversity, 26129 Oldenburg, Germany.

\* Correspondence: [meren@hifmb.de](mailto:meren@hifmb.de) and [efogarty@uchicago.edu](mailto:efogarty@uchicago.edu)

**Running Title:** pBI143 is ubiquitous across global human populations

# 1 ABSTRACT

2 Plasmids are extrachromosomal genetic elements that often encode fitness enhancing features.  
3 However, many bacteria carry ‘cryptic’ plasmids that do not confer clear beneficial functions. We  
4 identified one such cryptic plasmid, pBI143, which is ubiquitous across industrialized gut  
5 microbiomes, and is 14 times as numerous as crAssphage, currently established as the most abundant  
6 genetic element in the human gut. The majority of mutations in pBI143 accumulate in specific positions  
7 across thousands of metagenomes, indicating strong purifying selection. pBI143 is monoclonal in most  
8 individuals, likely due to the priority effect of the version first acquired, often from one’s mother.  
9 pBI143 can transfer between Bacteroidales and although it does not appear to impact bacterial host  
10 fitness *in vivo*, can transiently acquire additional genetic content. We identified important practical  
11 applications of pBI143, including its use in identifying human fecal contamination and its potential as  
12 an inexpensive alternative for detecting human colonic inflammatory states.

## 13 INTRODUCTION

14 The tremendous density of microbes in the human gut provides a playground for the contact-  
15 dependent transfer of mobile genetic elements <sup>1</sup> including plasmids. Plasmids are typically defined  
16 as extrachromosomal elements that replicate autonomously from the host chromosome <sup>1-4</sup>. In  
17 addition to being a workhorse for molecular biology, plasmids have been extensively studied for  
18 their ability to expedite microbial evolution <sup>5</sup> and enhance host fitness by providing properties such  
19 as antibiotic resistance, heavy metal resistance, virulence factors, or metabolic functions <sup>6-11</sup>.

20 Plasmids have been a major focus of microbiology not only for their biotechnological applications  
21 to molecular biology <sup>12-15</sup> but also for their role in the evolution and dissemination of genes for  
22 antibiotic resistance <sup>16,17</sup>, which is a growing global public health concern <sup>18</sup>. However, outside the  
23 spotlight lie a group of plasmids that appear to lack genetic functions of interest and that do not  
24 contain genes encoding obvious beneficial functions to their hosts <sup>19,20</sup>. Such ‘cryptic plasmids’  
25 are typically small and multi-copy <sup>21</sup>, and are often difficult to study as they lack any measurable  
26 phenotypes or selectable markers <sup>22,23</sup>, despite their presence in a broad range of microbial taxa <sup>24-</sup>  
27 <sup>27</sup>. In the absence of a clear advantage to their hosts, and the presumably non-zero cost of their  
28 maintenance, these plasmids are often described as selfish elements <sup>28</sup> or genetic parasites <sup>29</sup>.  
29 While they may provide unknown benefits to their hosts, a high transfer rate could also be a factor  
30 that enables cryptic plasmids to counteract the negative selection pressure of their maintenance <sup>29-</sup>  
31 <sup>31</sup>.

32 Analyses of cryptic plasmids are often performed on monocultured bacteria, limiting insights into  
33 the ecology of cryptic plasmids in their host’s natural environment. However, recent advances in  
34 shotgun metagenomics <sup>30</sup> and *de novo* plasmid prediction algorithms <sup>31-40</sup> offer a powerful means  
35 to bridge this gap. For instance, in a recent study we characterized over 68,000 plasmids from the  
36 human gut <sup>40</sup> and observed that the most prevalent known plasmid across geographically diverse  
37 human populations was a cryptic plasmid, called pBI143. Here we conduct an in-depth  
38 characterization of this cryptic plasmid through 'omics and experimental approaches to study its  
39 genetic diversity, host range, transmission routes, impact on the bacterial host, and associations  
40 with health and disease states. Our findings reveal the astonishing success of pBI143 in the human  
41 gut, where it occurs in up to 92% of individuals in industrialized countries with copy numbers 14

42 times higher on average than crAssphage, the most abundant phage in the human gut. We also  
43 demonstrate the potential of pBI143 as a cost-effective biomarker to assess the extent of stress that  
44 microbes experience in the human gut, and as a sensitive means to quantify the level of human  
45 fecal contamination in environmental samples.

## 46 RESULTS

47 pBI143 is extremely prevalent across industrialized human gut  
48 microbiomes

49 pBI143 (accession ID U30316.1) is a 2,747 bp circular plasmid first identified in 1985<sup>41</sup> in  
50 *Bacteroides fragilis*<sup>42</sup>, an important member of the human gut microbiome that is frequently  
51 implicated in states of health<sup>43–45</sup> and disease<sup>46,47</sup>. pBI143 encodes only two annotated genes: a  
52 mobilization protein (*mobA*) and a replication protein (*repA*) (Fig. 1A). Due to the desirable  
53 features for cloning such as a high copy number and genetic stability, pBI143 has been primarily  
54 used as a component of *E. coli-Bacteroides* shuttle vectors<sup>42</sup>. The absence of any ecological  
55 studies of pBI143 prompted us to characterize it further beginning with a characterization of its  
56 genetic diversity.

57 To comprehensively sample the diversity of pBI143, we screened 2,137 individually assembled  
58 human gut metagenomes (Supplementary Table 1) for pBI143-like sequences. By surveying all  
59 contigs using the known pBI143 sequence as reference, we found three distinct versions of pBI143  
60 (Fig. 1A), all of which had over 95% nucleotide sequence identity to one another throughout their  
61 entire length except at the *repA* gene, where the sequence identity was as low as 75% with a  
62 maximum of 81% between Version 1 and Version 2 (Supplementary Table 2).

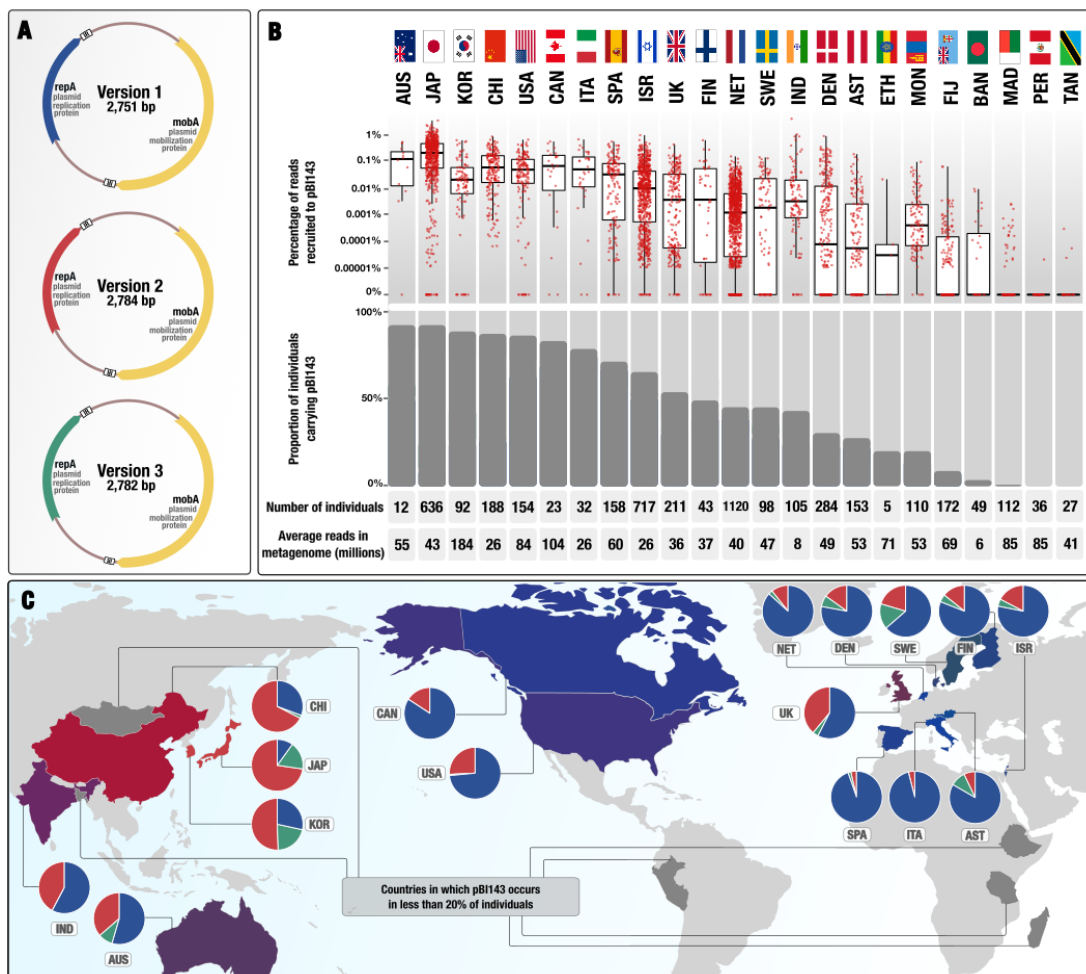

63

64

65

66

67

68

69

70

71

72

73

74

75

76

**Fig. 1 pBI143 prevalence and abundance in globally distributed human populations.** (A) Plasmid maps of the three distinct versions of pBI143, which differ primarily in the *repA* gene. IR = inverted repeat. The *repA* genes are colored according to Version 1 (blue), Version 2 (red) and Version 3 (green). (B) Read recruitment results from 4,516 metagenomes originating from 23 globally representative countries and mapped to pBI143. Top: The percentage of reads in each metagenome that mapped to pBI143 normalized by number of reads in the metagenome. Bottom: The proportion of individuals in a country that have pBI143 in their gut. Each red dot represents an individual metagenome. (C) Countries that are represented in our collection of 4,516 global adult gut metagenomes. Each country's pie chart is colored based on the version(s) of pBI143 that is most prevalent in that country (Version 1 = blue, Version 2 = red, Version 3 = green). Each country is colored based on the proportion of Version 1, 2 or 3 present in the population, or gray if fewer than 20% of individuals carry pBI143. Pie charts show the proportions of pBI143 versions in all individuals that carry it within a country.

77 We then sought to quantify the prevalence of pBI143 across global human populations using a  
78 metagenomic read recruitment survey with an expanded set of 4,516 publicly available gut  
79 metagenomes from 23 countries <sup>48,49,50,51,52,53,54,55,56,57,58,59,60,61,62,63,55,64,65,66,67,68,66,69,70</sup> (Supplementary  
80 Table 1). Recruiting metagenomic short reads from each gut metagenome using each pBI143  
81 version independently (Supplementary Fig. 1, Supplementary Table 3), we found that pBI143 was  
82 present in 3,295 metagenomes, or 73% of all samples (Fig. 1B, see Methods for the ‘detection’  
83 criteria). However, the prevalence of pBI143 was not uniform across the globe (Fig. 1B): pBI143  
84 occurred predominantly in metagenomes of individuals who lived in relatively industrialized  
85 countries, such as Japan (92% of 636 individuals) and the United States (86% of 154 individuals).  
86 We rarely detected pBI143 in individuals who lived in relatively non-industrialized countries such  
87 as Madagascar (0.8% of 112 individuals) or Fiji (8.7% of 172 individuals). This differential  
88 coverage is likely due to the non-uniform distribution of *Bacteroides* populations, which tend to  
89 dominate individuals who live in relatively more industrialized countries <sup>71</sup>. Within each  
90 individual, pBI143 was often highly abundant (Fig. 1B), and despite its small size, it often recruited  
91 0.1% to 3.5% of all metagenomic reads with a median coverage of over 7,000X (Supplementary  
92 Fig. 1, Supplementary Table 3). In one extreme example, pBI143 comprised an astonishing 7.5%  
93 of all reads in an infant gut metagenome from Italy, with a metagenomic read coverage exceeding  
94 54,000X (Supplementary Table 3).

95 The distribution of pBI143 versions across human populations was also not uniform as different  
96 versions of pBI143 tended to be dominant in different geographic regions. pBI143 Version 1 (98%  
97 identical to the original reference sequence for pBI143 <sup>41</sup>) dominated individuals in North America  
98 and Europe, and occurred on average in 82.5% of all samples that carry pBI143 from Austria,  
99 Canada, Denmark, England, Finland, Italy, Netherlands, Spain, Sweden and the USA (Fig. 1C,  
100 Supplementary Table 3). In contrast, pBI143 Version 2 dominated countries in Asia and occurred  
101 in 63.6% of all samples that carry pBI143 in China, Japan, and Korea (Fig. 1C, Supplementary  
102 Table 3). pBI143 Version 3 was relatively rare, comprising only 7.4% of pBI143-positive samples,  
103 and mostly occurred in individuals from Japan, Korea, Australia, Sweden, and Israel (Fig. 1C,  
104 Supplementary Table 3).

105 The extremely high prevalence and coverage of pBI143 suggests that it is likely one of the most  
106 numerous genetic elements in the gut microbiota of individuals from industrialized countries. We

107 compared the prevalence and relative abundance of pBI143 to crAssphage, a 97 kbp bacterial virus  
108 that is widely recognized as the most abundant family of viruses in the human gut<sup>72</sup>. pBI143 was  
109 more prevalent (73% vs 27%) in our metagenomes than crAssphage, although individual samples  
110 differed widely with respect to the abundance of these two elements in a given individual  
111 (Supplementary Table 3). The average percentage of metagenomic reads recruited by pBI143 and  
112 crAssphage were 0.05% and 0.13%, respectively. However, taking into consideration that  
113 crAssphage is approximately 36 times larger than pBI143, and assuming that average coverage is  
114 an acceptable proxy to the abundance of genetic entities, these data suggest that on average pBI143  
115 is 14 times more numerous than crAssphage in the human gut.

116 Overall, these data demonstrate that pBI143 is one of the most widely distributed and numerous  
117 genetic elements in the gut microbiomes of industrialized human populations world-wide.

## 118 pBI143 is specific to the human gut and hosted by a wide range of 119 Bacteroidales species

120 Interestingly, the detection patterns of pBI143 in metagenomes differed from the detection patterns  
121 we observed for its *de facto* host *Bacteroides fragilis* in the same samples; *B. fragilis* and pBI143  
122 co-occurred in only 41% of the metagenomes. Sequencing depth did not explain this observation,  
123 as pBI143 was highly covered (i.e., >50X) in 25% of metagenomes where *B. fragilis* appeared to  
124 be absent (Supplementary Table 11), suggesting that the host range of pBI143 extends beyond *B.*  
125 *fragilis*.

126 To investigate the host range of pBI143, we employed a collection of bacterial isolates from the  
127 human gut, which contained 717 genomes that represented 104 species in 54 genera  
128 (Supplementary Table 4). We found pBI143 in a total of 82 isolates that resolved to 11 species  
129 across 3 genera: *Bacteroides*, *Phocaeicola*, and *Parabacteroides*. Many of the pBI143-carrying  
130 isolates of distinct species were from the same individuals, suggesting that pBI143 can be  
131 mobilized between species. To confirm this, we inserted a tetracycline resistance gene, *tetQ*, into  
132 pBI143 in the *Phocaeicola vulgatus* isolate MSK 17.67 (Supplementary Fig. 2, Supplementary  
133 Table 4) and tested the ability of this engineered pBI143 to transfer to two strains of two different  
134 families of Bacteroidales, *Bacteroides ovatus* D2 and *Parabacteroides johnsonii* CL02T12C29. In

135 these assays, we found that pBI143 was indeed transferred from the donor to the recipient strains  
136 at a frequency of  $5 \times 10^{-7}$  and  $3 \times 10^{-6}$  transconjugants per recipient, respectively (Supplementary  
137 Fig. 2).

138 Given the broad host range of pBI143, one interesting question is whether the ecological niche  
139 boundaries of pBI143 hosts exceed a single biome, since the members of the order Bacteroidales  
140 are not specific to the human gut and do occur in a wide range of other habitats from non-human  
141 primate guts <sup>73</sup> to marine systems <sup>74</sup>. To investigate whether pBI143 might exist in non-human  
142 environments, we searched for pBI143 in metagenomes from coastal and open ocean samples <sup>75,76</sup>,  
143 captive macaques <sup>73</sup>, human-associated pets <sup>77</sup>, and sewage samples from across the globe <sup>78</sup>. The  
144 plasmid was absent from all non-human associated samples, but as expected, was present in  
145 sewage (Supplementary Fig. 3, Supplementary Table 3, Supplementary Text). Given the absence  
146 of pBI143 in non-human associated habitats, we also screened metagenomes from human skin and  
147 oral cavity <sup>70</sup>. Unlike the extremely high presence of pBI143 in the human gut, pBI143 was poorly  
148 detected both in samples from skin and the oral cavity (Supplementary Text). Finally, we designed  
149 and tested a highly specific qPCR assay for pBI143 (Supplementary Table 5) to confirm its  
150 specificity to the human gut. While there was a robust amplification of pBI143 from sewage  
151 samples confirming our insights from metagenomic coverages (Fig. 2), pBI143 was virtually  
152 absent in dog, alligator, raccoon, horse, pig, deer, cow, chicken, goose, cat, rabbit, deer, or gull  
153 fecal samples (Supplementary Table 6). The only exception was the relatively low copy number  
154 (i.e., 73-fold less than human fecal content of sewage) in three of the four cats tested.

155 The near-absolute exclusivity of pBI143 to the human gut presents practical opportunities, such as  
156 the accurate detection of human fecal contamination outside the human gut. Using the same PCR  
157 primers, we also amplified pBI143 from water and sewage samples and compared its sensitivity  
158 to the gold standard markers currently used for detecting human fecal contamination in the  
159 environment (16S rRNA gene amplification of human *Bacteroides* and Lachnospiraceae) <sup>79,80</sup>.  
160 pBI143 had higher amplification in all 41 samples where *Bacteroides* and Lachnospiraceae were  
161 also detected (Fig. 2). pBI143 was also amplified in 6 samples with no *Bacteroides* or  
162 Lachnospiraceae amplification, suggesting it is a highly sensitive marker for detecting the presence  
163 of human-specific fecal material.



164 Overall, these data show that pBI143 has a broad range of Bacteroidales species, is highly specific  
165 to the human gut environment, and can serve as a sensitive biomarker to detect human fecal  
166 contamination.

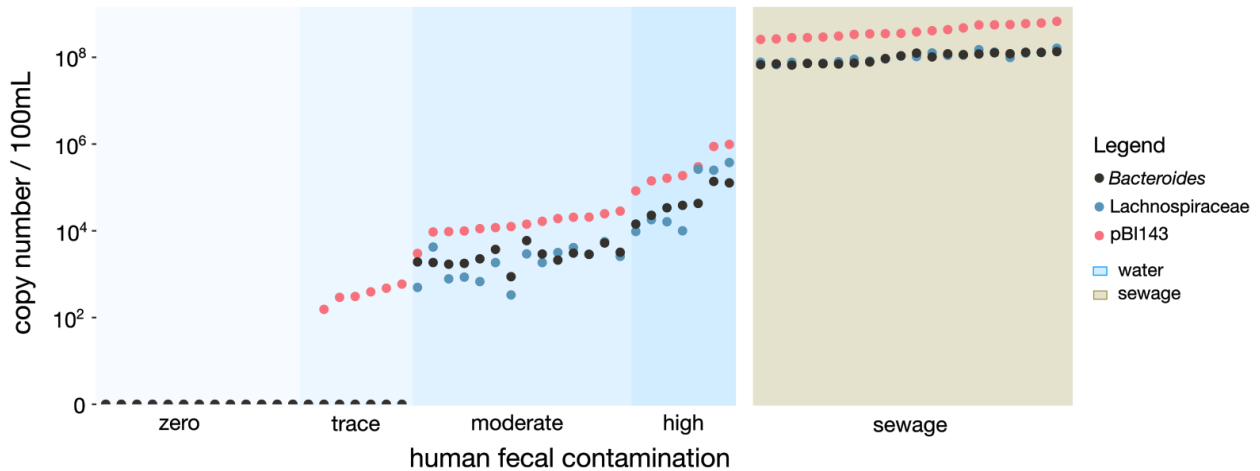

167

168 **Fig. 2. Detection of pBI143 and two established human fecal markers in water and sewage samples.**

169 Copy number of pBI143, human *Bacteroides* or Lachnospiraceae as measured by qPCR. Zero, trace,  
170 moderate, high and sewage categories and sample order designations are determined based on pBI143 copy  
171 number. Trace indicates one of the established markers was detected but was below the level of  
172 quantification. The blue background indicates water samples and the beige background indicates samples  
173 from sewage.

174 pBI143 is monoclonal within individuals, and its variants across  
175 individuals are maintained by strong purifying selection

176 So far, our investigation of pBI143 has focused on its ecology. Next, we sought to understand the  
177 evolutionary forces that have conserved the pBI143 sequence by quantifying the sequence  
178 variation among the three distinct versions and examining the distribution of single nucleotide  
179 variants (SNVs) within and across globally distributed individuals. Across the three versions, both  
180 pBI143 genes had low dN/dS values ( $mobA = 0.11$ ,  $repA = 0.04$ ), suggesting the presence of strong  
181 forces of purifying selection acting on *mobA* and *repA* resulting in primarily synonymous  
182 substitutions. While the comparison of the three representative sequences provide some insights  
183 into the conserved nature of pBI143, it is unlikely they capture its entire genetic diversity across  
184 gut metagenomes.

185 To explore the pBI143 variation landscape, we analyzed metagenomic reads that matched the  
186 Version 1 of *mobA* to gain insights into the population genetics of pBI143 in naturally occurring  
187 habitats through single-nucleotide variants (SNVs). Since the *mobA* gene was more conserved  
188 across distinct versions of the plasmid compared to the *repA* gene, focusing on *mobA* enabled  
189 characterization of variation from all plasmid versions using a single read recruitment analysis.  
190 Surprisingly, the vast majority (83.2%) of the nucleotide positions that varied in any metagenome  
191 matched a nucleotide position that was variable between at least one pair of the three plasmid  
192 versions (Fig. 3A, Supplementary Table 7). In other words, pBI143 variation across metagenomes  
193 was predominantly localized to certain nucleotide positions that differed between the  
194 representative sequences of pBI143 for Version 1, 2 and 3, indicating that the three representative  
195 versions capture the majority of permissible pBI143 variation within our collection of gut  
196 metagenomes. Indeed, only 24.5% of metagenomes had more than three novel SNVs that were not  
197 present in at least one plasmid version, and 84.8% of metagenomes had pBI143 sequences that  
198 were within 2-nucleotide distance of one of the three versions. In addition to the primarily localized  
199 variation of pBI143, we also observed that the vast majority of SNVs were fixed within a  
200 metagenome (i.e., a ‘departure from consensus’ value of  $\sim 0$ , see Methods), suggesting that most  
201 humans carry a monoclonal population of pBI143 with little to no within-individual variation (Fig.  
202 3C, Supplementary Table 7).

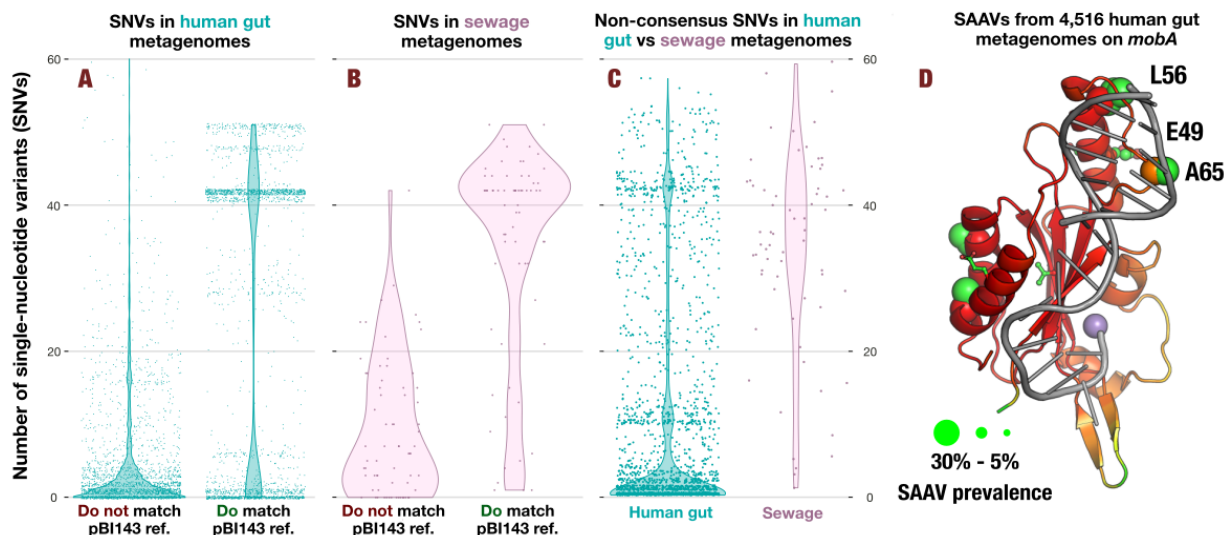

203

204 **Fig. 3. The mutational landscape of pBI143 in sewage and the human gut.** (A) The proportion of SNVs  
205 across 4,516 human gut metagenomes that are present in the same location (match) or different locations (do  
206 not match) as variation in one of the versions of pBI143 (turquoise). Each point is a single metagenome. (B)  
207 The proportion of SNVs across 68 sewage gut metagenomes that are present in the same location (match) or  
208 different locations (do not match) as variation in one of the versions of pBI143 (pink). (C) Non-consensus  
209 SNVs present in 4,516 human gut metagenomes and 68 sewage metagenomes. (D) AlphaFold 2 predicted  
210 structure of the catalytic domain of MobA with single amino acid variants from all 4,516 human gut  
211 metagenomes superimposed as ball-and-stick residues. oriT DNA (gray) and a Mn<sup>2+</sup> ion marking the active  
212 site (purple) were modeled based on 4lvi.pdb<sup>81</sup>. The size of the ball-and-stick spheres indicate the proportion  
213 of samples carrying variation in that position (the larger the sphere, the more prevalent the variation at the  
214 residue) and the color is in CPK format. The color of the ribbon diagram indicates the pLDDT from  
215 AlphaFold 2 with red = very high (> 90 pLDDT) and orange = confident (80 pLDDT).

216 Next, we sought to investigate the functional context of non-synonymous environmental variants  
217 of MobA given its structure. For this, we employed single-amino acid variants<sup>82</sup> (SAAVs) we  
218 recovered from gut metagenomes and superimposed them on the AlphaFold 2<sup>82,83</sup> predicted  
219 structure of MobA using Anvi'o structure<sup>84,82,83</sup>. The predicted catalytic domain of pBI143 MobA  
220 was structurally similar to MobM of the MobV-family (Protein Data Bank accession: 4LVI)  
221 encoded by plasmid pMV158<sup>81</sup>. We used the structurally similar catalytic domain in MobA to  
222 model the binding of the oriT of pBI143 to MobA. We found that there were only 21 SAAVs  
223 throughout MobA that were present in greater than 5% of the gut metagenomes (Fig. 3D).  
224 Interestingly, highly prevalent SAAVs occurred exclusively near the DNA binding site (L56, E49,  
225 and A64), suggesting that that the non-synonymous variants we observe in the context of MobA  
226 may be involved in altering the DNA binding specificity for the oriT sequence<sup>81</sup> demonstrating  
227 the coevolution of the oriT with the MobA protein between distinct pBI143 versions. Additionally,  
228 we find it likely that the cluster of high prevalence variation at residues V251, A246, V239, T238,  
229 I235, and L234 (Supplementary Fig. 4B) may be driven by interactions with different host  
230 conjugation machinery for plasmid transfer. The functional implications of prevalent SAAVs  
231 given the structural context of the MobA gene highlight the role of adaptive processes on the  
232 evolution of pBI143 versions.

233 Unlike the individual gut metagenomes, the pBI143 sequences did not occur in a monoclonal  
234 fashion in sewage metagenomes as expected (Supplementary Table 7). Sewage metagenomes had,  
235 on average, 35 SNVs with a departure from consensus value of lower than 0.9, revealing the  
236 polyclonal nature of pBI143 in sewage (Fig. 3C, Supplementary Table 7). Similar to the individual

237 gut metagenomes, most SNVs in sewage metagenomes (78.8%) occurred at a nucleotide position  
238 that was variable across at least one pair of the three pBI143 versions (Fig. 3B, Supplementary  
239 Table 7), suggesting that the majority of the variability in sewage is from the mixing of different  
240 versions of pBI143. However, the number of novel SNVs was much higher in sewage: 61.8% of  
241 sewage samples had greater than three SNVs that did not match a variable position in one of the  
242 three reference plasmids (Fig. 3B). Given the marked increase in the number of novel SNVs in  
243 sewage, it is likely there are additional but relatively rare versions of pBI143 in the human gut.

244 Overall, these results indicate that pBI143 has a highly restricted mutational landscape in natural  
245 habitats, frequently occurs as a monoclonal element in individual gut metagenomes, and the non-  
246 synonymous variants of MobA in the environment may be responsible for altering its DNA  
247 binding.

248 pBI143 is vertically transmitted, its variants are more specific to  
249 individuals than their host bacteria, and priority effects best explain its  
250 monoclonality in most individuals

251 The largely monoclonal nature of pBI143 presents an interesting ecological question: how do  
252 individuals acquire it, and what maintains its monoclonality? Multiple phenomena could explain  
253 the monoclonality of pBI143 in individual gut metagenomes, including (1) low frequency of  
254 exposure (i.e., most individuals are only ever exposed to one version), (2) bacterial host specificity  
255 (i.e., some plasmid versions replicate more effectively in certain bacterial hosts), or (3) priority  
256 effects (i.e., the first version of pBI143 establishes itself in the ecosystem and excludes others).  
257 The sheer prevalence and abundance of pBI143 across industrialized populations renders the ‘low  
258 frequency of exposure’ hypothesis an unlikely explanation. Yet the remaining two hypotheses  
259 warrant further investigation.

260 Bacterial host specificity is a plausible driver for the presence of a singular pBI143 version within  
261 an individual, given the interactions between plasmid replication genes and host replication  
262 machinery<sup>28,85</sup>. However, our analysis of 82 bacterial cultures isolated from 10 donors shows that  
263 the plasmid is more specific to individuals than it is to certain bacterial hosts (Fig. 4,  
264 Supplementary Table 9). Indeed, identical pBI143 sequences often occurred in multiple distinct

265 taxa isolated from the same individual, in agreement with the monoclonality of pBI143 in gut  
266 metagenomes and its ability to transfer within Bacteroidales. If pBI143 monoclonality is not driven  
267 by rare exposure or host specificity, it could be driven by priority effects <sup>86</sup>, where the initial  
268 pBI143 version somehow prevents other pBI143 versions from establishing in the same gut  
269 community.

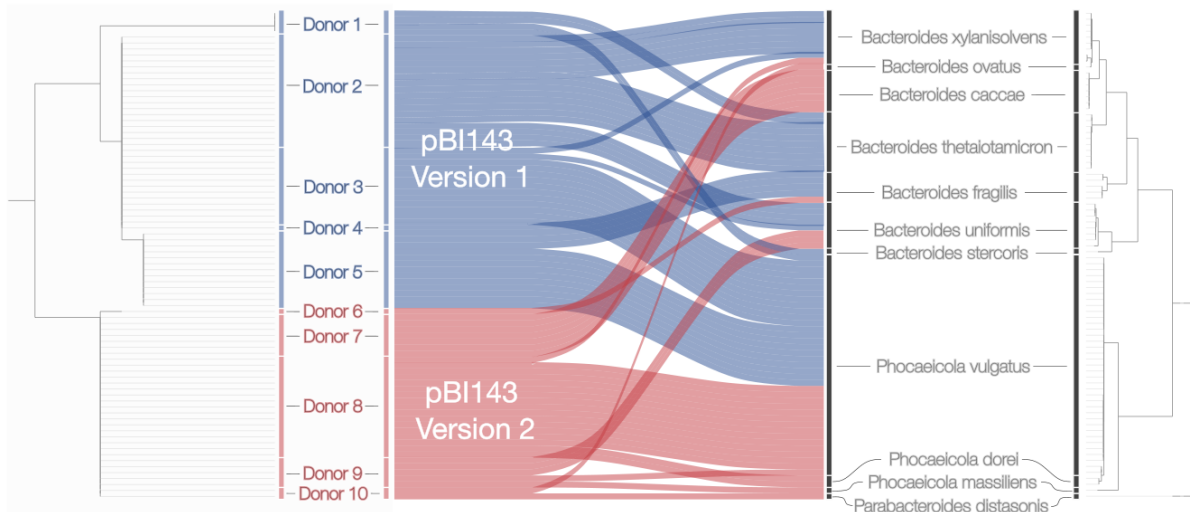

270

271 **Fig. 4. Phylogeny of pBI143 in human donors versus the phylogeny of bacterial isolates recovered from**  
272 **the same individuals.** pBI143 (left) and bacterial host (right) genome phylogenies. The pBI143 phylogeny  
273 was constructed using the MobA and RepA genes; the bacterial phylogeny was constructed using 38  
274 ribosomal proteins (see Methods). Blue alluvial plots are isolates with Version 1 pBI143 and red alluvial  
275 plots are isolates with Version 2 pBI143. No isolates had the rarer Version 3.

276 To examine if priority effects play a role in pBI143 monoclonality, we aimed to determine how  
277 pBI143 is acquired. Given that one established route of microbial acquisition is the vertical  
278 transmission of microbes from mother to infant <sup>87</sup>, we used our ability to track pBI143 SNVs  
279 between environments to investigate if there is evidence for vertical transmission. We followed  
280 the inheritance of identical SNV patterns in pBI143 using 154 mother and infant gut metagenomes  
281 from four countries, Finland <sup>57</sup>, Italy <sup>60</sup>, Sweden <sup>68</sup>, and the USA <sup>69</sup>, where each study followed  
282 participants from birth to 3 to 12 months of age. We recruited reads from each metagenome to  
283 Version 1 pBI143 (Supplementary Table 1 and 3, Supplementary Fig. 5) and identified the location  
284 of each SNV in *mobA* (Supplementary Table 10). These data revealed a large number of cases  
285 where pBI143 had identical SNV patterns in mother-infant pairs (Fig. 5A, Supplementary Table

286 10). A network analysis of shared SNV positions across metagenomes appeared to cluster family  
287 members more closely, indicating mother-infant pairs had more SNVs in common than they had  
288 with unrelated individuals, which we could further confirm by quantifying the relative distance  
289 between each sample to others (Supplementary Fig. 6, Supplementary Table 10, Methods).

290 Establishing that pBI143 is often vertically transferred, we next examined the impact of priority  
291 effects on pBI143 maintenance over time. We assumed that if priority effects are driving  
292 persistence of a single version of pBI143, the first version that enters the infant gut environment  
293 should be maintained over time. Indeed, many phage populations are influenced by priority effects  
294 where the presence of one phage provides a competitive advantage to the host<sup>88</sup> or host immunity  
295 to infection with similar phages<sup>89-91</sup>. In our data, we found no instances where pBI143 acquired  
296 from the mother was fully replaced in the infant during and up to the first year of life  
297 (Supplementary Fig. 5, Supplementary Table 10). While 69% of infants maintained the version  
298 received from the mother (Fig. 5B), we also observed other, less common genotypes. These less  
299 common cases included a ‘two versions’ scenario where the mother possessed two versions of  
300 pBI143, both of which were passed to the infant (21%), and a ‘wilt’ case, where the transferred  
301 pBI143 was neither replaced nor persisted until the end of sampling (7%) (Fig. 5B). Although  
302 these less prevalent phenotypes are not necessarily explained by priority effects, 69% maintenance  
303 of the initial version of pBI143 suggests that priority effects have an important role in the  
304 maintenance of pBI143 in the gut, despite many incoming populations colonizing the infant and  
305 likely carrying other pBI143 versions.

306 Overall, by tracking SNV patterns between environments we established that pBI143 is vertically  
307 transferred from mothers to infants and that priority effects likely play a role in maintaining the  
308 predominantly monoclonal populations of pBI143.

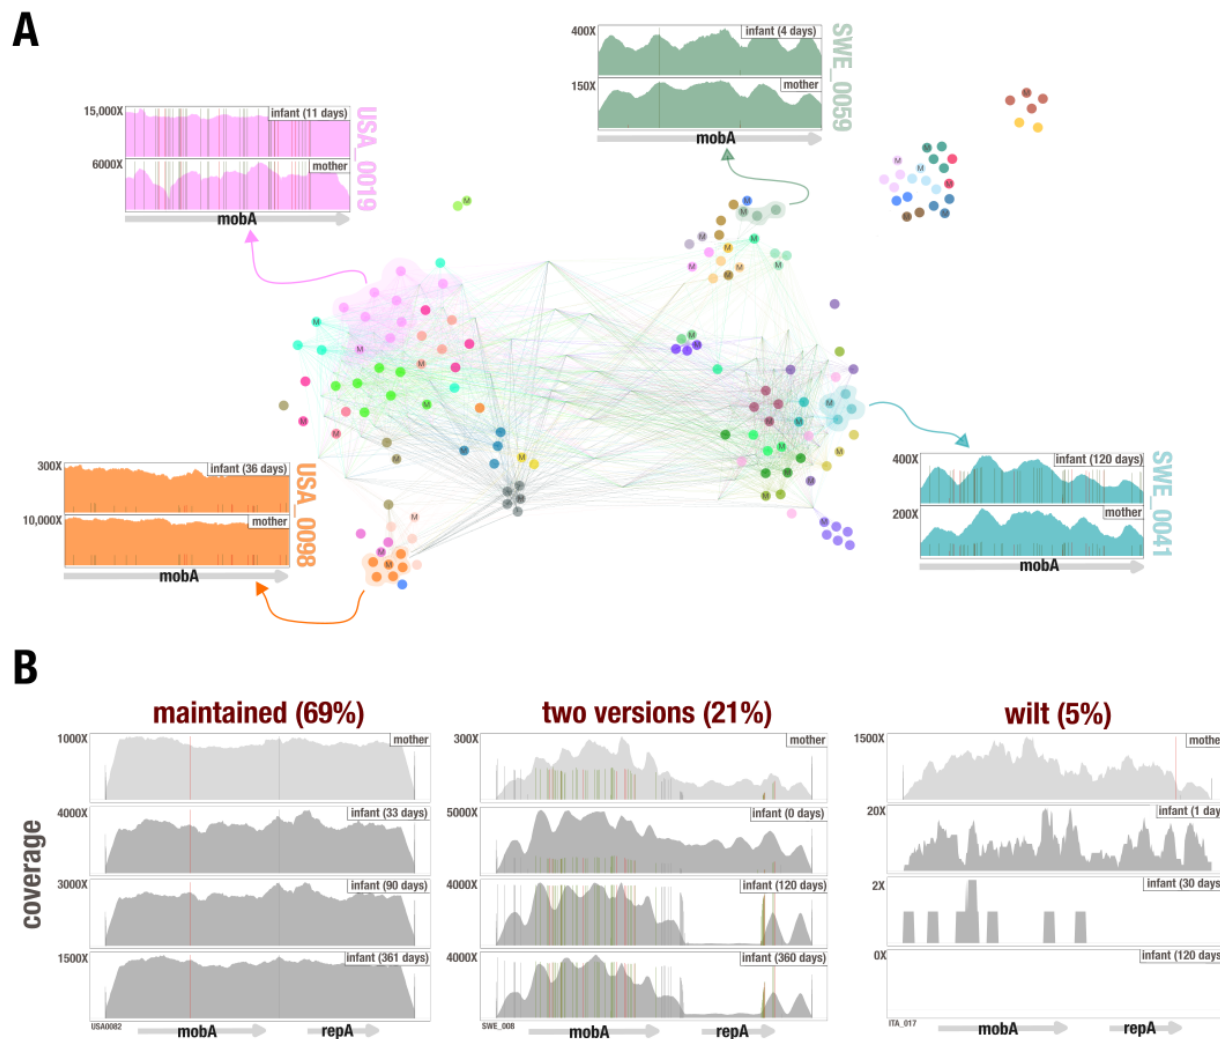

309

310 **Fig. 5. Transfer and maintenance of pBI143.** (A) The network shows the degree of similarity between pBI143 SNVs  
 311 across 154 mother and infant metagenomes from Finland, Italy, Sweden and the USA. Each node is an individual  
 312 metagenome and nodes are colored based on family grouping. The surrounding coverage plots (colored) are visual  
 313 representations of SNV patterns present in the indicated metagenomes. Nodes labeled with an “M” are mothers; nodes with  
 314 no labels are infants. (B) Representative coverage plots showing different coverage patterns (maintained, two versions or  
 315 wilt) observed in plasmids transferred from mothers to infants.

## 316 pBI143 is a highly efficient parasitic plasmid

317 An intuitive interpretation of the surprising levels of prevalence and abundance of pBI143 across  
 318 the human population, in addition to its limited variation maintained by strong evolutionary forces,  
 319 is that it provides some benefit to the bacterial host. However, the two annotated genes in pBI143  
 320 appear to serve only the purpose of ensuring its own replication and transfer, contradicting this

321 premise. The coverage of pBI143 and its *Bacteroides*, *Phocaeicola* and *Parabacteroides* hosts in  
 322 gut metagenomes indeed show a significant positive correlation ( $R^2$ : 0.5, p-value < 0.001) (Fig.  
 323 6A, Supplementary Table 11), however, these data are not suitable to distinguish whether pBI143  
 324 provides a benefit to the bacterial host fitness, or acts as a genetic hitchhiker.

325

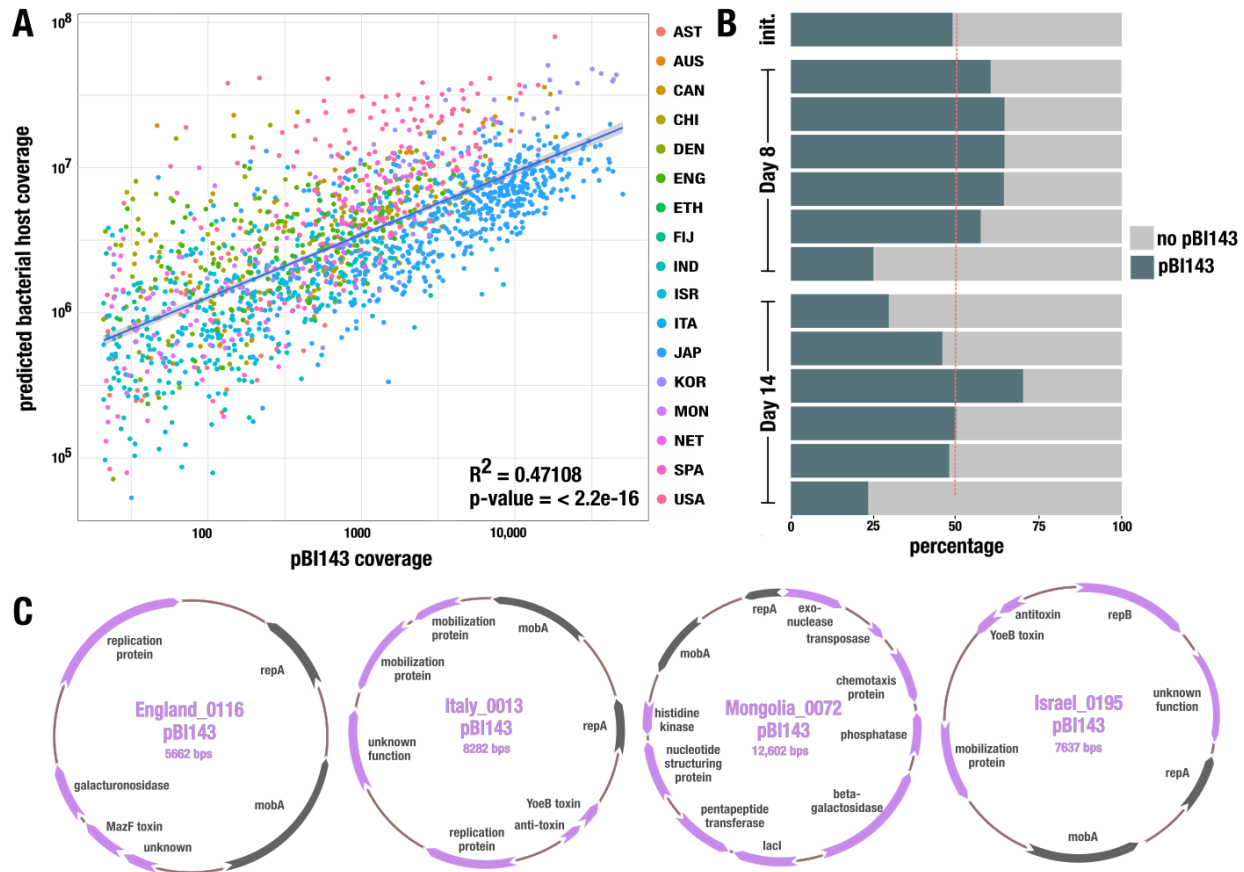

326

327 **Fig. 6. The relationship between pBI143 and its bacterial hosts.** (A) The average coverage of pBI143  
 328 and the corresponding coverage of predicted host genomes (*Bacteroides*, *Parabacteroides* and *Phocaeicola*)  
 329 in 4,516 metagenomes. (B) Competition experiments in gnotobiotic mice between *B. fragilis* with and  
 330 without pBI143. The proportion of pBI143-carrying cells in 6 mice in the initial inoculum, at Day 8 and at  
 331 Day 14 are shown. (C) Four examples of pBI143 assembled from metagenomes that carry additional cargo  
 332 genes. Gray genes are the canonical *repA* and *mobA* genes of naive pBI143; lilac genes are additional cargo.

333



334 To experimentally investigate if pBI143 is advantageous or parasitic, we constructed isogenic pairs  
335 of *B. fragilis* 638R and *B. fragilis* 9343 with and without the native Version 1 sequence of pBI143  
336 (Supplementary Methods). To determine if pBI143 is well-adapted to replication in a new  
337 *Bacteroides* host, we tested its maintenance in culture. After 7 days of passaging, pBI143 was still  
338 present in all colonies of *B. fragilis* 638R and *B. fragilis* 9343 (Supplementary Table 12). Next,  
339 we competed the *B. fragilis* 638R (with and without pBI143) of *B. fragilis* 638R in gnotobiotic  
340 mice for 2 weeks. At Day 8, 5/6 mice had more *B. fragilis* 638R with pBI143 than without;  
341 however this trend did not continue into Day 14, where 4/6 mice had fewer cells with pBI143 (Fig.  
342 6B, Supplementary Table 12). While we can speculate that these populations may continue to  
343 fluctuate, the results at least suggest a negligible negative fitness impact of pBI143 on its bacterial  
344 host.

345 One potential benefit that pBI143 could provide to its host is to act as a natural shuttle vector by  
346 transiently acquiring additional genetic material and transferring it between cells in a community.  
347 In fact, in our survey of assembled gut metagenomes we observed a few cases that may support  
348 such a role for pBI143. In most individuals, we assembled pBI143 in its native form with 2 genes.  
349 However, there were 10 instances where the assembled pBI143 sequence from a given  
350 metagenome contained additional genes (Fig. 6C, Supplementary Table 2). Many of the additional  
351 genes have no predicted function, but other cargo include toxin-antitoxin genes conferring plasmid  
352 stability, as well as those that may confer beneficial functions to the bacterial host, such as  
353 galacturonosidase, pentapeptide transferase, phosphatase, and histidine kinase genes. These  
354 occasional larger versions of pBI143 share a common backbone of *repA* and *mobA* and thus form  
355 a “plasmid system”<sup>40</sup>, a common plasmid evolutionary pattern suggesting the possibility that  
356 pBI143 may dynamically acquire different genes in different environments.

357 Overall, it does not appear that the native sequence of pBI143 provides a clear benefit to its host  
358 cells, however it does appear to positively correlate with these hosts in metagenomic data, and is  
359 maintained in the absence of selection in new hosts *in vitro*.

360 pBI143 responds to oxidative stress *in vitro*, and its copy number is  
361 significantly higher in metagenomes from individuals who are diagnosed  
362 with IBD

363 Mobile genetic elements rely on their hosts for replication machinery, but many have developed  
364 mechanisms to increase their rates of replication and transfer during stressful conditions to increase  
365 the likelihood of their survival if the host cell dies<sup>92–95</sup>. To investigate whether the copy number  
366 of pBI143 changes as a function of stress, we first conducted an experiment with *B. fragilis* isolates  
367 that naturally carry pBI143.

368 Given that oxygen exposure upregulates oxidative stress response pathways in the anaerobic *B.*  
369 *fragilis*<sup>96</sup>, we exposed two different *B. fragilis* cultures, *B. fragilis* R16 (which was isolated from  
370 a healthy individual) and *B. fragilis* 214 (which was isolated from a pouchitis patient<sup>97</sup>) to 21%  
371 oxygen for increasing periods of time (Fig. 7A, Supplementary Fig. 7, Supplementary Table 13).  
372 To calculate the copy number of pBI143 in culture, we quantified the ratio between the total  
373 number of plasmids and the total number of cells in culture using a qPCR with primers targeting  
374 pBI143 and a *B. fragilis*-specific gene we identified through pangenomics (Methods). As the  
375 length of oxygen exposure increased, the copy number of pBI143 per cell also increased. Notably,  
376 the copy number was quickly reduced to control levels once the cultures were returned to anaerobic  
377 conditions, indicating that copy number fluctuation is a rapid and transient process that is  
378 dependent on host stress.

379 Oxidative stress is also a signature characteristic of inflammatory bowel disease (IBD), a group of  
380 intestinal disorders that cause inflammation of the gastrointestinal tract<sup>98</sup>. The dysregulation of  
381 the immune system during IBD typically leads to high levels of oxidative stress in the gut  
382 environment<sup>99</sup>. We thus hypothesized that, if oxidative stress is among the factors that drive the  
383 increased copy number of pBI143 in culture, one should expect a higher copy number of pBI143  
384 in metagenomes from IBD patients compared to healthy controls.

385 To analyze the copy number of pBI143 in a given metagenome, we calculated the ratio of  
386 metagenomic read coverage between pBI143 and its bacterial host in metagenomes where pBI143  
387 could confidently be assigned to a single host. With these considerations, we developed an

388 approach to calculate an ‘approximate copy number ratio’ (ACNR) for pBI143 and its  
389 unambiguous bacterial host in a given metagenome using bacterial single-copy core genes (see  
390 Methods). We calculated the ACNR of pBI143 in 3,070 healthy and 1,350 IBD gut metagenomes  
391 (Supplementary Table 1, Supplementary Fig. 1 and 8). Our analyses showed that the geometric  
392 mean of the ACNR for pBI143 and its host was 3.72 times larger (robust-Wald 95% CI: 2.66x -  
393 5.20x, p-value <  $10^{-13}$ ) in IBD compared to healthy metagenomes, indicating that the pBI143  
394 ACNR was significantly higher in individuals with IBD compared to those who were healthy (Fig.  
395 7B, Supplementary Table 14).

396

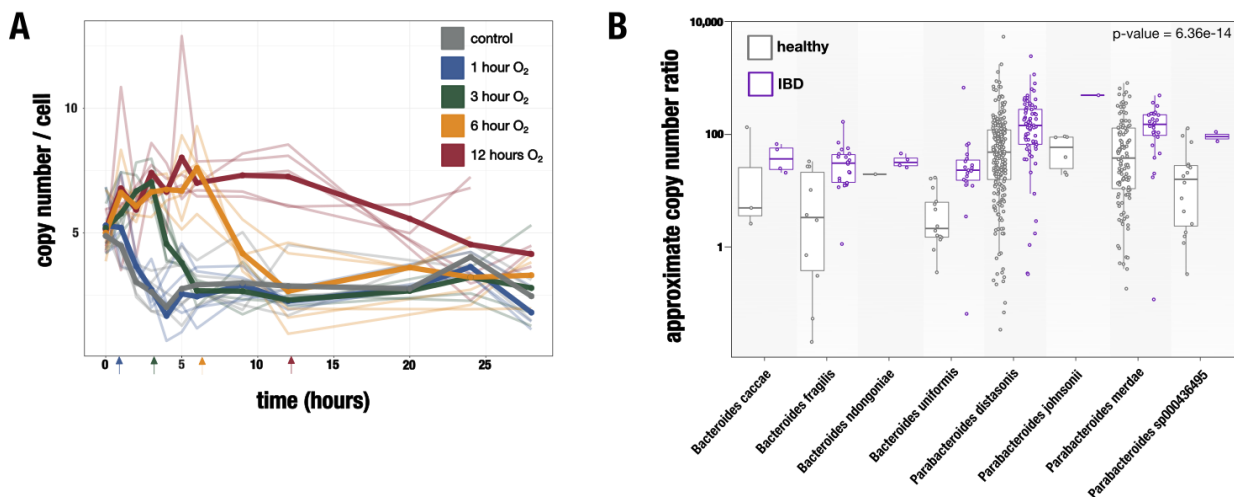

397

398 **Fig. 7. pBI143 copy number increases in stressful environments.** (A) Copy number of pBI143 in *B.*  
399 *fragilis* 214 cultures with increasing exposure to oxygen. Arrows indicate the time point at which the culture  
400 was returned to the anaerobic chamber. The control cultures (gray) were never exposed to oxygen. Opaque  
401 lines are the mean of 5 replicates (translucent lines). (B) Host-specific approximate copy number ratio  
402 (ACNR) of pBI143 in healthy individuals (gray) versus those with IBD (purple).

403

404 The copy number ratio of pBI143 to its *B. fragilis* host in culture calculated with qPCR primers  
405 was much lower (~5X on average) compared to its approximate copy number ratio in healthy  
406 metagenomes (~120X on average). Multiple factors can explain this difference, including biases  
407 associated with sequencing steps or the calculation of the coverage, or that the conditions naturally  
408 occurring communities experience vastly differ than those conditions encountered in culture media,

409 even in the presence of oxygen. Nevertheless, the marked increase of the relative coverages of  
410 pBI143 and its host in IBD metagenomes suggest the potential utility of this cryptic plasmid for  
411 unbiased measurements of stress. Overall, these results show that both in metagenomes and  
412 experimental conditions, an increased copy number of pBI143 is a consistent phenotype in the  
413 presence of host stress.

## 414 DISCUSSION

415 Our work shed lights on a mysterious corner of life in the human gut. Even though pBI143 is found  
416 in greater than 90% of all individuals in some countries, the prevalence of this cryptic plasmid has  
417 gone unnoticed for almost four decades since its discovery by Smith, Rollins, and Parker<sup>41</sup>. The  
418 remarkable ecology, evolution, and potential practical applications of pBI143 that we  
419 characterized here through ‘omics analyses as well as *in vitro* and *in vivo* laboratory experiments  
420 offer a glimpse of the world of understudied cryptic plasmids in the human gut, and elsewhere.

421 The application of population genetics principles to pBI143 through the recovery of single-  
422 nucleotide variants (SNVs) and single-amino acid variants (SAAVs) from gut metagenomes  
423 reveals not only the strong forces of purifying selection on the evolution of its sequence, but also  
424 hints the presence of adaptive processes at localized amino acid positions that are variable in the  
425 critical parts of the DNA-interacting residues of the catalytic domain of its mobilization protein.  
426 The presence of pBI143 does not appear to systematically impact bacterial host fitness *in vivo*,  
427 which makes this cryptic plasmid seem a mundane parasite, somewhat contradicting the strict  
428 evolutionary pressures that maintain its environmental sequence variants.

429 That said, our observations from naturally occurring gut environments include cases where pBI143  
430 carries additional genes, likely acting as a natural shuttle vector. Although traditionally mobile  
431 genetic elements are classified as mutualistic or parasitic with respect to the bacterial host, the  
432 fluidity of pBI143 to fluctuate between the cryptic 2-gene state and the larger 3 or more gene state  
433 with potentially beneficial functions, suggests that the boundaries between parasitism and  
434 mutualism for pBI143 are not clear cut. Instead, pBI143 may act as a ‘discretionary parasite’,  
435 where it has a cryptic form for the majority of its existence in which it could be best described as  
436 a parasite, while occasionally being found with additional functions that may be beneficial to its

437 host as a function of environmental pressures. Testing this hypothesis with future experimentation,  
438 and if true, investigating to what extent discretionary parasitism applies to cryptic plasmids, may  
439 lead to a deeper understanding of the role cryptic plasmids play in microbial fitness to changing  
440 environmental conditions.

441 Our findings show that it has important potential practical applications beyond molecular biology.  
442 The first and most straightforward of these applications relies on the prevalence and human  
443 specificity of pBI143 to more sensitively detect human fecal contamination in water samples.  
444 Human fecal pollution is a global public health problem, and accurate and sensitive indicators of  
445 human fecal pollution are essential to identify and remediate contamination sources and to protect  
446 public health<sup>100</sup>. While culture assays for *E. coli* or enterococci have historically been used to  
447 detect human fecal contamination in environmental samples, the common occurrence of these  
448 organisms in many different mammalian guts and the poor sensitivity of such assays motivated  
449 researchers in the past two decades to utilize PCR amplification of 16S rRNA genes, specifically  
450 those from human-specific *Bacteroides* and *Lachnospiraceae* populations, to detect human-  
451 specific fecal contamination with minimal cross-reactivity with animal feces<sup>79,80</sup>. Our  
452 benchmarking of pBI143 with qPCR revealed that pBI143 is an extremely sensitive and specific  
453 marker of human fecal contamination that typically occurs in human fecal samples and sewage in  
454 numbers that are several-fold higher than the state-of-the-art markers, which enabled the  
455 quantification of fecal contamination in samples where it had previously gone undetected. Another  
456 practical application of pBI143 takes advantage of its natural shuttle vector capabilities to  
457 incorporate additional genetic material into its backbone. Our demonstration that pBI143 (1)  
458 replicates in many abundant gut microbes, (2) can be stably introduced to new hosts, and (3)  
459 naturally acquires genetic material makes this cryptic plasmid an ideal natural payload delivery  
460 system for future therapeutics targeting the human gut microbiome. Indeed, our observations of  
461 pBI143 with cargo genes in metagenomes indicates that this likely happens in nature. Yet another  
462 practical implication of pBI143 is its utility to measure the level of stress in the human gut.  
463 Surveying thousands of samples from individuals who are healthy or diagnosed with IBD, our  
464 results show that across all bacterial hosts, the approximate copy number of pBI143 increases in  
465 individuals with IBD.

466 From a more philosophical point of view, the prevalence and high conservancy of pBI143 across  
467 globally distributed human populations questions the traditional definition of the ‘core’  
468 microbiome<sup>101</sup>. In its aim to define a core microbiome, the field of microbial ecology has primarily  
469 focused on bacteria, although sometimes including prevalent archaea or fungi<sup>102–105</sup>. However,  
470 our results indicate that there are mobile genetic elements that fit the standard criteria of prevalence  
471 to be defined as core. Broadening the definition of a core microbiome beyond microbial taxa may  
472 enable the recognition of other mobile genetic elements (eg. plasmids, phages, transposons) that  
473 are prevalent across human populations and fill critical gaps in our understanding of gut microbial  
474 ecology.

## 475 Materials and Methods

476 **Genomes and metagenomes.** We acquired the original pBI143 genome from the National Center for  
477 Biotechnological Information (GenBank: U30316.1). We manually assembled the three reference versions  
478 of pBI143 (Version 1, 2 and 3) from metagenomes samples USA0006, CHI0054 and ISR0084. We acquired  
479 717 human gut isolate genomes from the Duchossois Family Institute collection (Supplementary Table 4).  
480 We downloaded 4,516 healthy human adult gut metagenomes from the National Center for Biotechnology  
481 Information (NCBI) from (Australia (Accession ID: PRJEB6092), Austria<sup>48</sup>, Bangladesh<sup>49</sup>, Canada<sup>50</sup>,  
482 China<sup>51,52</sup>, Denmark<sup>53</sup>, England<sup>54</sup>, Ethiopia<sup>55</sup>, Fiji<sup>56</sup>, Finland<sup>57</sup>, India<sup>58</sup>, Israel<sup>59</sup>, Italy<sup>60,61</sup>, Japan<sup>62</sup>,  
483 Korea<sup>63</sup>, Madagascar<sup>55</sup>, Mongolia<sup>55,64</sup>, Netherlands<sup>65</sup>, Peru<sup>66</sup>, Spain<sup>67</sup>, Sweden<sup>68</sup>, Tanzania<sup>61</sup>, and the  
484 USA<sup>66,69,70</sup>) (Supplementary Table 1). We acquired 1,096 gut metagenomes from infant-mother pairs from  
485 Italy, Finland, Sweden and the USA from NCBI (Supplementary Table 1). We downloaded 935  
486 metagenomes from non-human gut environments (marine ecosystems, pet dog guts, monkey guts, sewage,  
487 human oral cavity, and human skin) (Supplementary Table 1).

488 **Metagenomic assembly, read recruitment, and the recovery of coverage and detection statistics.**  
489 Unless otherwise specified, we performed all metagenomic analyses throughout the manuscript within the  
490 open-source anvi’o v7 software ecosystem (<https://anvio.org>)<sup>106</sup>. We automated assembly and read  
491 recruitment steps using the anvi’o metagenomics workflow<sup>107</sup> which used snakemake v5.10<sup>108</sup>. To quality-  
492 filter genomic and metagenomic raw paired-end reads we used illumina-utils v1.4.4<sup>109</sup> program ‘iu-filter-  
493 quality-minoche’ with default parameters, and IDBA\_UD v1.1.2 with the flag ‘--min\_contig 1000’ to  
494 assemble the metagenomes<sup>110</sup>. We used Bowtie2 v2.4<sup>111</sup> to recruit reads from the metagenomes to  
495 reference sequences and samtools v1.9<sup>112</sup> to convert resulting SAM files into sorted and indexed BAM

496 files. We generated anvi'o contigs databases (<https://anvio.org/m/contigs-db>) using the command `anvi-  
497 gen-contigs-database`, during which Prodigal v2.6.3<sup>113</sup> identifies open reading frames. We created anvi'o  
498 profile databases of the mapping results for each metagenome using `anvi-profile`, which stores coverage  
499 and detection statistics, and `anvi-merge` to combine all profiles together. To recover coverage and  
500 detection statistics for a given merged profile database, we used the program `anvi-summarize` with `--init-  
501 gene-coverages` flag.

502 **Criteria for detection of pBI143 and crAssphage in metagenomes.** Using mean coverage to assess the  
503 occurrence of a given sequence in a given sample based on metagenomic read recruitment can yield  
504 misleading insights due to non-specific read recruitment (i.e., recruitment of reads from metagenomes to a  
505 reference sequence from non-target populations). Thus, we relied upon the detection statistic reported by  
506 anvi'o, which is a measure of the proportion of the nucleotides in a given sequence that are covered by at  
507 least one short read. We considered pBI143 was present in a metagenome only if its detection value was  
508 0.5 or above. Values of detection in metagenomic read recruitment results often follow a bimodal  
509 distribution for populations that are present and absent (see Supplementary Fig. 2 in ref.<sup>114</sup>). Thus, 0.5 is a  
510 conservative cutoff to minimize a false-positive signal to assume presence.

511 **Distinguishing the presence of distinct pBI143 versions in a genome or metagenome.** We used the  
512 results of individual read recruitments to each known version of pBI143 to measure the coverage of each  
513 gene in pBI143 in samples that had a detection of greater than 0.9 and compared the ratio of the coverage  
514 of each gene. The pBI143 version where the genes have the most even coverage ratio was considered the  
515 predominant version in that genome or metagenome.

516 **Addition of tetQ to pBI143.** To study transfer of pBI143 from *Phocaeicola vulgatus* MSK 17.67 to other  
517 Bacteroidales species, we added *tetQ* to pBI143. We PCR amplified *tetQ* from *Bacteroides caccae*  
518 CL03T12C61 and inserted it at the site shown in Supplementary Fig. 2 (all primers are listed in  
519 Supplementary Table 15). We PCR amplified the DNA regions flanking each side of this insertion site  
520 and the three PCR products were cloned into BamHI-digested pLGB13<sup>115</sup>. We conjugally transferred this  
521 plasmid into *Phocaeicola vulgatus* MSK 17.67 and selected cointegrates on gentamycin 200 µg/ml and  
522 erythromycin 10 µg/ml. We passaged the cointegrate in non-selective medium and selected the resolvents  
523 by plating on anhydrotetracycline (75 ng/ml). We confirmed pBI143 contained *tetQ* by WGS the strain at  
524 the DFI Microbiome Metagenomics Facility.

525 **Transfer assays.** The recipient strains that received pBI143-*tetQ* were *Parabacteroides johnsonii*  
526 CL02T12C29 and *Bacteroides ovatus* D2, both erythromycin resistant and tetracycline sensitive. We grew  
527 the donor strain *Phocaeicola vulgatus* MSK 17.67 pBI143-*tetQ* and recipient strains to an OD600 of ~ 0.7

528 and mixed them at a 10:1 ratio (v:v) donor to recipient, and spotted 10  $\mu$ l onto BHIS plates and grew them  
529 anaerobically for 20 h. We resuspended the co-culture spot in 1 mL basal media and cultured 10-fold serial  
530 dilutions on plates with erythromycin (to calculate number of recipients) or erythromycin and tetracycline  
531 (4.5  $\mu$ g/ml) (to select for transconjugants). We performed multiplex PCR as described<sup>116,117</sup> to confirm that  
532 TetR ErmR colonies were the recipient strain containing pBI143-tetQ (Supplementary Fig. 2).

533 **Calculations of purifying selection and characterization of single nucleotide variants across**  
534 **metagenomes.** We calculated dN/dS ratios as described previously<sup>84</sup>; details of which can also be found  
535 at <https://merenlab.org/data/anvio-structure/chapter-IV/#calculating-dndstextgene-for-1-gene>. To  
536 determine the mutational landscape of pBI143 across metagenomes, we first identified all variable positions  
537 present in the reference pBI143 sequences. We used the program `anvi-script-gen-short-reads` to generate  
538 artificial short reads from the version 2 and version 3 pBI143 sequences and recruited these reads to the  
539 version 1 pBI143 sequence to generate data similar to the read recruitment from metagenomes. Then, we  
540 took read recruitment data from the global human gut metagenomes and sewage metagenomes mapped to  
541 version 1 pBI143. We ran `anvi-gen-variability-profile` on the artificial read recruitment profile databases  
542 as well as on all profile databases from metagenomes with greater than 10X Q2Q3 coverage to identify all  
543 SNV positions. We compared the SNV positions in each gut or sewage metagenome to those present in our  
544 reference sequences and calculated the number of SNVs in each metagenome that did and did not match  
545 SNVs in the references. To calculate the number of non-consensus SNVs in a metagenome, we again ran  
546 the command `anvi-gen-profile-database` on the same metagenomes, this time with the flags `--gene-caller-  
547 ids 0`, `--min-departure-from-consensus 0.1`, `--include-contig-names` and `--quince-mode`, which  
548 produces a file that describes the variation in every single position across the reference and calculates the  
549 departure from consensus for each SNV with a departure from consensus greater than 0.1.

550 **pBI143 structural and polymorphism analysis.** To explore the impact of SAAVs on the protein structure  
551 of pBI143 MobA, we *de novo* predicted the monomer and dimer structures using AlphaFold 2 (AF) in  
552 ColabFold with default settings<sup>83</sup>. AlphaFold 2 confidently predicted the structure of the catalytic domain  
553 but had low pLDDT scores for the coil domains and the dimer interactions. However, we explored variants  
554 across the whole dimer complex. Next, we integrated the pBI143 MobA AF structure into anvi'o structure  
555 by running `anvi-gen-structure-database`<sup>82</sup>. After that, we summarized SNV data as SAAVs from the  
556 metagenomic read recruitment data using `anvi-gen-variability-profile --engine AA` to create a variability  
557 profile (<https://anvio.org/m/variability-profile>). Subsequently, we superimposed the SAAV data variability  
558 profile on the structure with `anvi-display-structure` which filtered for variants that had at least 0.05  
559 departure from consensus (reducing our metagenomic samples size from 2221 to 1706). Finally, we  
560 analyzed SAAVs that were prevalent in at least 5% of remaining samples. This left us with 21 SAAVs to



561 analyze on the monomer. Next, we explored the relationship between SAAVs, relative solvent accessibility  
562 (RSA), and ligand binding residues in pBI143 MobA. To do this, we identified the homologous structure  
563 PDB 4LVI (MobM) by searching the high pLDDT pBI143 AF domain against the structure database  
564 PDB100 2201222 using Foldseek (<https://search.foldseek.com/search>). We next structurally aligned the  
565 pBI143 MobA AF structure to PDB 4LVI ( MobM) <sup>118</sup> using PyMol <sup>119</sup>. We chose the MobM structure  
566 4LVI rather than a MobA because it had more structural and sequence homology to the pBI143 MobA  
567 catalytic domain AF structure than any PDB MobA structures. Additionally, we leveraged residue  
568 conservation values from the pre-calculated [4LVI ConSurf analysis](#) to further explore ligand binding  
569 residues <sup>120,121</sup>.

570 **Phylogenetic tree construction.** To construct the pBI143 phylogeny, we identified pBI143 contigs from  
571 the isolate genome assemblies (Supplementary Table 4) using BLAST <sup>122</sup>. We ran ‘anvi-gen-contigs-  
572 database’ on each pBI143 contig followed by ‘anvi-export-gene-calls’ with the flag ‘--gene-caller prodigal’  
573 and concatenated the resulting amino acid sequences. For the bacterial host phylogeny, we ran ‘anvi-gen-  
574 contigs-database’ on each assembled genome. Then, we extracted ribosomal genes (see Supplementary  
575 Methods for details), aligned them with MUSCLE v3.8.1551 <sup>123</sup>, trimmed the alignments with trimAl <sup>124</sup>  
576 using the flag ‘-gt 0.5’, and computed the phylogeny with IQ-TREE 2.2.0-beta using the flags ‘-m MFP’  
577 and ‘-bb 1000’ <sup>125</sup>. We visualized the trees with ‘anvi-interactive’ in ‘--manual-mode’, and used the  
578 metadata provided by the Duchossois Family Institute to label the isolates to their corresponding donors.  
579 We used the ‘geom\_alluvium’ function in ggplot2 to make the alluvial plots..

580 **Construction and analysis of the network that describes shared single-nucleotide variants across**  
581 **mothers and infants.** To investigate whether single-nucleotide variants suggest a vertical transmission of  
582 pBI143, we used metagenomic read recruitment results from four independent study that generated  
583 metagenomic sequencing of fecal samples collected from mothers and their infants in Finland <sup>57</sup>, Italy <sup>60</sup>,  
584 Sweden <sup>68</sup>, and the USA <sup>69</sup>, against the pBI143 Version 1 reference sequence. The URL  
585 <https://merenlab.org/data/pBI143> serves a fully reproducible workflow of this analysis. The primary input  
586 for this investigation was the anvi'o variability data, which is calculated by the anvi'o program ‘anvi-  
587 profile’, and reported by the anvi'o program ‘anvi-gen-variability-profile’ (with the flag ‘--engine NT’).  
588 The program ‘anvi-gen-variability-profile’ (<https://anvio.org/m/anvi-gen-variability-profile>) offers a  
589 comprehensive description of the single-nucleotide variants in metagenomes for downstream analyses.  
590 Since the *mobA* gene was conserved enough to represent all three versions of pBI143, for downstream  
591 analyses we limited the context to study variants to the *mobA* gene. The total number of samples in the  
592 entire dataset with at least one variable nucleotide position was 309, which represented a total of 102  
593 families (Sweden: 52, USA: 24, Finland: 14, Italy: 11). We removed any sample that did not belong to a

594 minimal complete family (i.e., at least one sample for the mother, and at least one sample of her infant),  
595 which reduced the number of families in which both members are represented to 57 families (Sweden: 36,  
596 USA: 16, Finland: 3, Italy: 2). We further removed families if the coverage of the *mobA* gene was not 50X  
597 or more in at least one mother and one infant sample in the family, which reduced the number of families  
598 with both members represented and with a reliable coverage of *mobA* to 49 families (Sweden: 33, USA:  
599 13, Finland: 2, Italy: 1), and from a given family, we only used the samples that had at least 50X for  
600 downstream analyses. We subsampled the variability data in R to only include the variable nucleotide  
601 position data for the final list of samples. We then used the list of single-nucleotide variants reported in this  
602 file to generate a network description of these data using the program ``anvi-gen-variability-network``, which  
603 reports an 'edge' between any sample pairs that share a SNV with the same competing nucleotides. We then  
604 used Gephi <sup>126</sup>, an open-source network visualization program, with the ForceAtlas2 algorithm <sup>127</sup> to  
605 visualize the network. To quantify the extent of similarity between family members based on single-  
606 nucleotide patterns in the data, we generated a distance matrix from the same dataset using the ``pdist``  
607 function in Python's standard library with ``cosine`` distances. We calculated the average distance of each  
608 sample to all other samples in its familial group (``within distance``), as well as the average distance from  
609 each sample to all other samples not present in their familial group (``between distance``). We subtracted the  
610 within distance from the between distance to get the ``subtracted distance``.

611 **Metagenomic taxonomy estimation.** We used Kraken 2.0.8-beta with the flags ``--output``, ``--report``, ``--`  
612 `use-mpa-style``, ``--quick``, ``--use-names``, ``--paired`` and ``--classified-out`` to estimate taxonomic  
613 composition of each metagenome <sup>128</sup>. For the genus-level taxonomic data, we filtered for metagenomes  
614 where the total number of reads recruited to a *Bacteroides*, *Parabacteroides* or *Phocaeicola* genome was  
615 >1000 and the mean coverage of pBI143 was >20X. For the species-level taxonomic data, we used a cutoff  
616 of >0.1% percent of reads recruited to designate presence or absence of *B. fragilis* and >0.0001% for pBI143  
617 based on the sizes of the genomes respectively (the *B. fragilis* genome is 3 orders of magnitude larger than  
618 pBI143).

619 **Isogenic strain construction.** We constructed the plasmid vector pEF108 (as shown in Supp Fig.  
620 pEF108\_plasmid\_map) by PCR amplifying the desired sections with primers `vec_108F`, `vec_108R`,  
621 `frag1_108F`, `frag1_108R`, `frag2_108R` and `frag2_108R` (Supplementary Table 15) from existing  
622 plasmids. We assembled the three fragments via Gibson assembly using standard conditions described for  
623 NEB Gibson assembly mastermix. We selected for transconjugants on LB-carbenicillin (100ug/mL), then  
624 conjugated pEF108 into *B. fragilis* 638R and selected on BHIS + erythromycin 25ug/mL. Then, we counter-  
625 selected for recombination events in pEF108 to remove the markers and leave naive pBI143 by growing  
626 cells on *Bacteroides* minimal media plates (BMM) with 10mM p-chlorophenylalanine. We screened

627 pBI143 positive, pheS-negative colonies via PCR and confirmed them by WGS. See Supplementary  
628 Methods for details.

629 ***In vitro* competition experiments.** We grew each strain described above in BHIS to OD 0.6-0.8. We  
630 combined equal volumes of cells and plated these cells on BHIS plates. We added 50 $\mu$ L of the combined  
631 strains to 5mL BHIS and grew these cultures to OD 0.6-0.8, then plated again on BHIS plates. We replica  
632 plated all colonies from BHIS to BHIS supplemented with cefoxitin (15ug/mL) or erythromycin (10 ug/mL)  
633 and counted the resulting colonies to determine the starting and final ratios of each strain.

634 **Mouse competitive colonization assays.** All animal experimentation was approved by the Institutional  
635 Animal Care and Use Committee at the University of Chicago. We gavaged three male and three female  
636 10-15 week old germ-free C57BL/6J mice with a 1:1 inoculum of *B. fragilis* 638R:*B. fragilis* 638R pBI143.  
637 Males and females were housed separately in isocages and remained gnotobiotic for the duration of the  
638 experiment. We collected fecal pellets after eight and 14 days, diluted and plated on BHIS plates. We  
639 performed PCR on 48 colonies per mouse using a mixture of four primers (Supplementary Table 15), one  
640 set that amplifies a 1248-bp region of the 638R chromosome and a second set that amplifies a 662-bp  
641 segment of pBI143. PCR amplicons from all colonies included the 1248-bp region of the 638R chromosome  
642 and a subset also contained the amplicon for pBI143, allowing calculation of the ratio over time. The exact  
643 starting ratio for gavage was also calculated using this same PCR.

644 **Approximate copy number ratio calculation in metagenomes.** The first challenge to use metagenomic  
645 coverage values to study pBI143 copy number trends in human gut metagenomes is the unambiguous  
646 identification of gut metagenomes that appear to have a single possible pBI143 bacterial host beyond  
647 reasonable doubt. To establish insights into the taxonomic make up of the gut metagenomes we previously  
648 assembled, we first ran the program `anvi-estimate-scg-taxonomy` ([https://anvio.org/m/anvi-estimate-scg-](https://anvio.org/m/anvi-estimate-scg-taxonomy)  
649 `taxonomy`) with the flags `--metagenome-mode` (to profile every single single-copy core gene (SCG)  
650 independently) and `--compute-scg-coverages` (to compute coverages of each SCG from the read  
651 recruitment results). We also used the flag `--scg-name-for-metagenome-mode` to limit the search space  
652 for a single ribosomal protein. We used the following list of ribosomal proteins for this step as they are  
653 included among the SCGs anvi'o assigns taxonomy using GTDB, and we merged resulting output files:  
654 Ribosomal\_S2, Ribosomal\_S3\_C, Ribosomal\_S6, Ribosomal\_S7, Ribosomal\_S8, Ribosomal\_S9,  
655 Ribosomal\_S11, Ribosomal\_S20p, Ribosomal\_L1, Ribosomal\_L2, Ribosomal\_L3, Ribosomal\_L4,  
656 Ribosomal\_L6, Ribosomal\_L9\_C, Ribosomal\_L13, Ribosomal\_L16, Ribosomal\_L17, Ribosomal\_L20,  
657 Ribosomal\_L21p, Ribosomal\_L22, ribosomal\_L24, and Ribosomal\_L27A. For our downstream analyses  
658 that relied upon the merged SCG taxonomy and coverage output reported by anvi'o, we considered

659 *Bacteroides*, *Parabacteroides* and *Phocaeicola* as the genera for candidate pBI143 host ‘species’, and only  
660 considered metagenomes in which a single species from these genera was present. Our determination of  
661 whether or not a single species of these genera was present in a given metagenome relied on the coverage  
662 of species-specific single-copy core genes (SCGs), where the taxonomic assignment to a given SCG  
663 resolved all the way down to the level of species unambiguously. We excluded any metagenome from  
664 further consideration if three or more candidate host species had positive coverage in any SCG in a  
665 metagenome. Due to highly conserved nature of ribosomal proteins and bioinformatics artifacts, it is  
666 possible that even when a single species is present in a metagenome, one of its ribosomal proteins may  
667 match to a different species in the same genus given the limited representation of genomes in public  
668 databases compared to the diversity of environmental populations. So, to minimize the removal of  
669 metagenomes from our analysis, we took extra caution with metagenomes before discarding them if only  
670 two candidate host species had positive coverage in any SCG. We kept such a metagenome in our  
671 downstream analyses only if one species was detected with only a single SCG, and the other one was  
672 detected by at least 8. In this case we assumed the large representation of one species (with 8 or more  
673 ribosomal genes) suggests the presence of this organism in this habitat confidently, and assumed the single  
674 hit to another species within the same genus was likely due to bioinformatics artifacts. It is the most  
675 unambiguous case if only a single candidate host species was detected in a given metagenome, but we still  
676 removed a given metagenome from further consideration if that single species had 3 or fewer SCGs in the  
677 metagenome. These criteria deemed 584 of 2580 metagenomes to have an unambiguous pBI143 host that  
678 resolved to 21 distinct species names. We further removed from our modeling the metagenomes where the  
679 candidate host species did not occur in any other metagenome, which removed 5 of these candidate host  
680 species from further consideration. Finally, we further removed any metagenome in which the pBI143  
681 coverage was less than 5X. Our final dataset to calculate the “approximate copy number ratio” (ACNR) of  
682 pBI143 in metagenomes through coverage ratios contained 579 metagenomes with one of 16 unambiguous  
683 pBI143 hosts. We calculated the ACNR by dividing the observed coverage of pBI143 by the empirical  
684 mean coverage of the host by averaging the coverage of all host SCGs found in the metagenome. To  
685 estimate the multiplicative difference in the geometric mean ACNR, we fit a linear model for the expected  
686 value of the logarithm of the ACNR, with disease status and bacterial host as predictors using `rigr` to  
687 construct the interval and estimate <sup>129</sup>.

688 **Oxidative stress experiments.** We grew *B. fragilis* 214 in 5 mL BHIS for 15 hours in an anaerobic  
689 chamber. We inoculated 750  $\mu$ L of this culture into 30mL BHIS in quintuplicate, and grew them for 3  
690 hours. We divided the 30 mL into a further 5 culture flasks of 5 mL BHIS, and exposed each to oxygen  
691 with constant shaking for the appropriate time before returning the flask to the anaerobic chamber. At each

692 time point, we took an aliquot of culture to determine the copy number of pBI143 in that sample. We  
693 extracted DNA from the cultures using a Thermal NaOH preparation<sup>130</sup> to prepare them for qPCR. Copy  
694 number calculated can be found in Supplementary Table 13.

695 **Estimating the pBI143 Plasmid Copy Number by Real-time qPCR.** To evaluate plasmid copy number  
696 (CN), we developed a real-time TaqMan probe multiplex PCR assay to amplify both pBI143 and a single-  
697 copy *B. fragilis*-specific genomic reference gene (referred to as hsp [heat shock protein]) in the same  
698 reaction (see Supplementary Information for details). We confirmed the primer and probe specificity to *B.*  
699 *fragilis* with BLAST searches against the NCBI and Ensembl databases, and experimental validation on 45  
700 common gut isolates. For absolute quantification, we constructed a standard curve for each gene of interest  
701 by plotting the mean quantification cycle (Cq) values against log[quantity] of a dilution series of known  
702 gene of interest amount (range:  $3 \times 10^0$  to  $3 \times 10^6$  copies/reaction). We calculated the CN of pBI143 per  
703 genome equivalent (hsp), by dividing the absolute quantity of plasmid target by the absolute quantity of  
704 chromosomal target in the sample using the standard-curve (SC) method of absolute quantification<sup>131</sup>.  
705 Standard curves were generated with every qPCR run for analysis and to confirm PCR efficiency.  
706 Additional details for qPCR, including standard curves and controls, can be found in Supplemental  
707 Information. Supplementary Table 5 and Supplementary Table 15 report the relevant data and all primers,  
708 respectively.

709 **qPCR analysis of animal, untreated sewage and water samples.** Samples were tested with the pBI143  
710 assay and two established assays for human fecal markers that included HF183 and Lachno3<sup>132</sup>. For  
711 screening of animal samples to assess the presence of this plasmid in non-human gut microbiomes, archived  
712 DNA from a previous study<sup>133</sup> was analyzed and included 14 different animals encompassing 81 individual  
713 fecal samples. For assessment of fecal contamination of surface waters, archived DNA from 40 samples of  
714 river water<sup>134-136</sup> and freshwater beaches<sup>137</sup> were analyzed. These water samples were chosen from these  
715 previous studies that represented a range of contamination based on HF183 and Lachno3 levels. A total of  
716 20 archived untreated sewage samples as reported in Olds et al.<sup>132</sup> were also analyzed for comparison.  
717 Since we were using archived samples from previous studies, we retested all the samples for the two human  
718 markers to account for any degradation. Additional details for qPCR, including standard curves and  
719 controls, can be found in the Supplemental Information.

720 **Visualizations.** We used ggplot2<sup>138</sup> to generate all box and scatter plots. We generated coverage plots  
721 using anvi'o, with the program `anvi-script-visualize-split-coverages`. We finalized the figures for  
722 publication using Inkscape, an open-source vector graphics editor (available from <http://inkscape.org/>).

## 723 Data availability

724 All genomes and metagenomes are available via the NCBI Sequence Read Archive, and the accession  
725 numbers for metagenomes and genomes are reported in Supplementary Table 1 and Supplementary Table  
726 4, respectively. The data object identifier (DOI) [10.6084/m9.figshare.22336666](https://doi.org/10.6084/m9.figshare.22336666) gives access to  
727 Supplementary Table and Supplementary Information files. Additional DOIs for anvi'o data products that  
728 describe metagenomic read recruitment results as well as sequences for pBI143 versions and bioinformatics  
729 workflows are accessible at the URL <https://merenlab.org/data/pBI143> to reproduce our findings. Bacterial  
730 cultures for host range investigations, which are listed in Supplementary Table 4, are courtesy of The  
731 Duchossois Family Institute (<https://dfi.uchicago.edu/>). *B. fragilis* strains with pBI143 are available upon  
732 request from the Comstock Lab collection (<https://comstocklab.uchicago.edu/>).

## 733 Acknowledgements

734 We thank the members of the Meren Lab (<https://merenlab.org>) and Comstock Lab  
735 (<https://comstocklab.uchicago.edu/>) for helpful discussions, Jason Koval for help procuring bacterial  
736 cultures, and the Duchossois Family Institute WGS facility for sequencing constructs. We thank Melinda  
737 Bootsma for help with the qPCRs on water and sewage samples. ECF acknowledges support from the  
738 University of Chicago International Student Fellowship, and ADW acknowledges support from NIGMS  
739 R35 GM133420. Additional support for ECF came from an NIH NIDDK grant (RC2 DK122394) to EBC.  
740 Authors thank The University of Chicago Center for Data and Computing for their support. This project  
741 was funded by University of Chicago start-up funds to AME.

## 742 Author contributions

743 ECF and AME conceived the study. KL developed methodology. RM, EK, and AME developed  
744 computational analysis tools. ECF, MSS, PAR, ADW and AME performed formal analyses. ECF,  
745 KL, MS and LEC conducted investigations. TM, MKY, MM and SLM provided resources. ECF,  
746 MSS, ADW and AME curated data. ECF and AME prepared the figures. ECF and AME wrote the  
747 paper with critical input from all authors. LEC and AME supervised the project. EBC and AME  
748 acquired funding.

## 749 Ethics declarations

### 750 Ethics approval and consent to participate

751 Not applicable.

### 752 Consent for publication

753 Not applicable.

### 754 Competing interests

755 The authors declare that they have no competing interests.

## 756 References

- 757 1. Frost, L.S., Leplae, R., Summers, A.O., and Toussaint, A. (2005). Mobile genetic elements:  
758 the agents of open source evolution. *Nat. Rev. Microbiol.* *3*, 722–732.
- 759 2. Black, B.E. (2017). Centromeres and Kinetochores: Discovering the Molecular Mechanisms  
760 Underlying Chromosome Inheritance (Springer).
- 761 3. Kazlauskas, D., Varsani, A., Koonin, E.V., and Krupovic, M. (2019). Multiple origins of  
762 prokaryotic and eukaryotic single-stranded DNA viruses from bacterial and archaeal  
763 plasmids. *Nat. Commun.* *10*, 3425.
- 764 4. Solar, G. del, del Solar, G., Giraldo, R., Ruiz-Echevarría, M.J., Espinosa, M., and Díaz-  
765 Orejas, R. (1998). Replication and Control of Circular Bacterial Plasmids. *Microbiology*  
766 *and Molecular Biology Reviews* *62*, 434–464. [10.1128/mmbr.62.2.434-464.1998](https://doi.org/10.1128/mmbr.62.2.434-464.1998).
- 767 5. Garoña, A., and Dagan, T. (2021). Darwinian individuality of extrachromosomal genetic  
768 elements calls for population genetics tinkering. *Environ. Microbiol. Rep.* *13*, 22–26.
- 769 6. Jacob, A.E., and Hobbs, S.J. (1974). Conjugal transfer of plasmid-borne multiple antibiotic  
770 resistance in *Streptococcus faecalis* var. *zymogenes*. *J. Bacteriol.* *117*, 360–372.
- 771 7. Moo-Young, M., Anderson, W.A., and Chakrabarty, A.M. (2013). Environmental  
772 Biotechnology: Principles and Applications (Springer Science & Business Media).
- 773 8. Endo, G., Ji, G., and Silver, S. (1995). Heavy Metal Resistance Plasmids and Use in  
774 Bioremediation. *Environmental Biotechnology*, 47–62. [10.1007/978-94-017-1435-8\\_5](https://doi.org/10.1007/978-94-017-1435-8_5).

- 775 9. Thouand, G., and Marks, R. (2016). *Bioluminescence: Fundamentals and Applications in*  
776 *Biotechnology - Volume 3* (Springer).
- 777 10. Palomino, A., Gewurz, D., DeVine, L., Zajmi, U., Morales, J., Abu-Rumman, F., Smith,  
778 R.P., and Lopatkin, A.J. (2022). Metabolic genes on conjugative plasmids are highly  
779 prevalent in *Escherichia coli* and can protect against antibiotic treatment. *ISME J.*  
780 10.1038/s41396-022-01329-1.
- 781 11. Al-Shayeb, B., Schoelmerich, M.C., West-Roberts, J., Valentin-Alvarado, L.E., Sachdeva,  
782 R., Mullen, S., Crits-Christoph, A., Wilkins, M.J., Williams, K.H., Doudna, J.A., et al.  
783 (2022). Borgs are giant genetic elements with potential to expand metabolic capacity.  
784 *Nature* *610*, 731–736.
- 785 12. Leonard, S.P., Perutka, J., Powell, J.E., Geng, P., Richhart, D.D., Byrom, M., Kar, S.,  
786 Davies, B.W., Ellington, A.D., Moran, N.A., et al. (2018). Genetic Engineering of Bee Gut  
787 Microbiome Bacteria with a Toolkit for Modular Assembly of Broad-Host-Range Plasmids.  
788 *ACS Synth. Biol.* *7*, 1279–1290.
- 789 13. Slattery, S.S., Diamond, A., Wang, H., Therrien, J.A., Lant, J.T., Jazey, T., Lee, K.,  
790 Klassen, Z., Desgagné-Penix, I., Karas, B.J., et al. (2018). An Expanded Plasmid-Based  
791 Genetic Toolbox Enables Cas9 Genome Editing and Stable Maintenance of Synthetic  
792 Pathways in *Phaeodactylum tricornutum*. *ACS Synth. Biol.* *7*, 328–338.
- 793 14. Rihn, S.J., Merits, A., Bakshi, S., Turnbull, M.L., Wickenhagen, A., Alexander, A.J.T.,  
794 Baillie, C., Brennan, B., Brown, F., Brunker, K., et al. (2021). A plasmid DNA-launched  
795 SARS-CoV-2 reverse genetics system and coronavirus toolkit for COVID-19 research.  
796 *PLoS Biol.* *19*, e3001091.
- 797 15. Salvay, D.M., Zelivyanskaya, M., and Shea, L.D. (2010). Gene delivery by surface  
798 immobilization of plasmid to tissue-engineering scaffolds. *Gene Ther.* *17*, 1134–1141.
- 799 16. Mutuku, C., Gazdag, Z., and Melegh, S. (2022). Occurrence of antibiotics and bacterial  
800 resistance genes in wastewater: resistance mechanisms and antimicrobial resistance control  
801 approaches. *World J. Microbiol. Biotechnol.* *38*, 1–27.
- 802 17. Dimitriu, T. (2022). Evolution of horizontal transmission in antimicrobial resistance  
803 plasmids. *Microbiology* *168*, 001214.
- 804 18. Prestinaci, F., Pezzotti, P., and Pantosti, A. (2015). Antimicrobial resistance: a global  
805 multifaceted phenomenon. *Pathog. Glob. Health* *109*, 309–318.
- 806 19. Kang, X., Li, C., and Luo, Y. (2020). Cloning of pAhX22, a small cryptic plasmid from  
807 *Aeromonas hydrophila*, and construction of a pAhX22-derived shuttle vector. *Plasmid* *108*,  
808 102490.
- 809 20. Oliveira, V., Polónia, A.R.M., Cleary, D.F.R., Huang, Y.M., de Voogd, N.J., da Rocha,  
810 U.N., and Gomes, N.C.M. (2021). Characterization of putative circular plasmids in sponge-  
811 associated bacterial communities using a selective multiply-primed rolling circle



- 812 amplification. *Mol. Ecol. Resour.* *21*, 110–121.
- 813 21. Shareck, J., Choi, Y., Lee, B., and Miguez, C.B. (2004). Cloning vectors based on cryptic  
814 plasmids isolated from lactic acid bacteria: their characteristics and potential applications in  
815 biotechnology. *Crit. Rev. Biotechnol.* *24*, 155–208.
- 816 22. Attéré, S.A., Vincent, A.T., Paccaud, M., Frenette, M., and Charette, S.J. (2017). The Role  
817 for the Small Cryptic Plasmids As Moldable Vectors for Genetic Innovation in *Aeromonas*  
818 *salmonicida* subsp. *salmonicida*. *Frontiers in Genetics* *8*. 10.3389/fgene.2017.00211.
- 819 23. Challacombe, J.F., Pillai, S., and Kuske, C.R. (2017). Shared features of cryptic plasmids  
820 from environmental and pathogenic *Francisella* species. *PLoS One* *12*, e0183554.
- 821 24. Roberts, M.C. (1989). Plasmids of *Neisseria gonorrhoeae* and other *Neisseria* species.  
822 *Clinical Microbiology Reviews* *2*. 10.1128/cmr.2.suppl.s18.
- 823 25. Zillig, W., Prangishvilli, D., Schleper, C., Elferink, M., Holz, I., Albers, S., Janekovic, D.,  
824 and Götz, D. (1996). Viruses, plasmids and other genetic elements of thermophilic and  
825 hyperthermophilic Archaea. *FEMS Microbiol. Rev.* *18*, 225–236.
- 826 26. Heuer, H., and Smalla, K. (2012). Plasmids foster diversification and adaptation of bacterial  
827 populations in soil. *FEMS Microbiol. Rev.* *36*, 1083–1104.
- 828 27. Vincent, A.T., Hosseini, N., and Charette, S.J. (2021). The *Aeromonas salmonicida*  
829 plasmidome: a model of modular evolution and genetic diversity. *Annals of the New York*  
830 *Academy of Sciences* *1488*, 16–32. 10.1111/nyas.14503.
- 831 28. Thomas, C.M. (2014). Evolution and Population Genetics of Bacterial Plasmids. *Plasmid*  
832 *Biology*, 507–528. 10.1128/9781555817732.ch25.
- 833 29. Iranzo, J., Puigbò, P., Lobkovsky, A.E., Wolf, Y.I., and Koonin, E.V. (2016). Inevitability  
834 of Genetic Parasites. *Genome Biology and Evolution* *8*, 2856–2869. 10.1093/gbe/evw193.
- 835 30. Quince, C., Walker, A.W., Simpson, J.T., Loman, N.J., and Segata, N. (2017). Shotgun  
836 metagenomics, from sampling to analysis. *Nat. Biotechnol.* *35*, 833–844.
- 837 31. Andreopoulos, W.B., Geller, A.M., Lucke, M., Balewski, J., Clum, A., Ivanova, N.N., and  
838 Levy, A. (2022). Deeplasmid: deep learning accurately separates plasmids from bacterial  
839 chromosomes. *Nucleic Acids Res.* *50*, e17.
- 840 32. Krawczyk, P.S., Lipinski, L., and Dziembowski, A. (2018). PlasFlow: predicting plasmid  
841 sequences in metagenomic data using genome signatures. *Nucleic Acids Res.* *46*, e35.
- 842 33. Zhou, F., and Xu, Y. (2010). cBar: a computer program to distinguish plasmid-derived from  
843 chromosome-derived sequence fragments in metagenomics data. *Bioinformatics* *26*, 2051–  
844 2052.
- 845 34. Pellow, D., Mizrahi, I., and Shamir, R. (2020). PlasClass improves plasmid sequence

- 846 classification. PLoS Comput. Biol. *16*, e1007781.
- 847 35. Carattoli, A., Zankari, E., García-Fernández, A., Larsen, M.V., Lund, O., Villa, L.,  
848 Aarestrup, F.M., and Hasman, H. (2014). *In Silico* Detection and Typing of Plasmids using  
849 PlasmidFinder and Plasmid Multilocus Sequence Typing. *Antimicrobial Agents and*  
850 *Chemotherapy* *58*, 3895–3903. 10.1128/aac.02412-14.
- 851 36. Robertson, J., and Nash, J.H.E. (2018). MOB-suite: software tools for clustering,  
852 reconstruction and typing of plasmids from draft assemblies. *Microb Genom* *4*.  
853 10.1099/mgen.0.000206.
- 854 37. Garcillán-Barcia, M.P., Francia, M.V., and de la Cruz, F. (2009). The diversity of  
855 conjugative relaxases and its application in plasmid classification. *FEMS Microbiol. Rev.*  
856 *33*, 657–687.
- 857 38. Rozov, R., Brown Kav, A., Bogumil, D., Shterzer, N., Halperin, E., Mizrahi, I., and Shamir,  
858 R. (2017). Recycler: an algorithm for detecting plasmids from de novo assembly graphs.  
859 *Bioinformatics* *33*, 475–482.
- 860 39. Pellow, D., Zorea, A., Probst, M., Furman, O., Segal, A., Mizrahi, I., and Shamir, R. (2021).  
861 SCAPP: an algorithm for improved plasmid assembly in metagenomes. *Microbiome* *9*, 144.
- 862 40. Yu, M.K., Fogarty, E.C., and Murat Eren, A. The genetic and ecological landscape of  
863 plasmids in the human gut. 10.1101/2020.11.01.361691.
- 864 41. Smith, C.J., Rollins, L.A., and Parker, A.C. (1995). Nucleotide sequence determination and  
865 genetic analysis of the *Bacteroides* plasmid, pBI143. *Plasmid* *34*, 211–222.
- 866 42. Smith, C.J. (1985). Development and use of cloning systems for *Bacteroides fragilis*:  
867 cloning of a plasmid-encoded clindamycin resistance determinant. *J. Bacteriol.* *164*, 294–  
868 301.
- 869 43. Tan, H., Zhao, J., Zhang, H., Zhai, Q., and Chen, W. (2019). Novel strains of *Bacteroides*  
870 *fragilis* and *Bacteroides ovatus* alleviate the LPS-induced inflammation in mice. *Appl.*  
871 *Microbiol. Biotechnol.* *103*, 2353–2365.
- 872 44. Lee, Y.K., Mehrabian, P., Boyajian, S., Wu, W.-L., Selicha, J., Vonderfecht, S., and  
873 Mazmanian, S.K. (2018). The Protective Role of *Bacteroides fragilis* in a Murine Model of  
874 Colitis-Associated Colorectal Cancer. *mSphere* *3*. 10.1128/msphere.00587-18.
- 875 45. Ochoa-Repáraz, J., Mielcarz, D.W., Wang, Y., Begum-Haque, S., Dasgupta, S., Kasper,  
876 D.L., and Kasper, L.H. (2010). A polysaccharide from the human commensal *Bacteroides*  
877 *fragilis* protects against CNS demyelinating disease. *Mucosal Immunol.* *3*, 487–495.
- 878 46. Purcell, R.V., Pearson, J., Aitchison, A., Dixon, L., Frizelle, F.A., and Keenan, J.I. (2017).  
879 Colonization with enterotoxigenic *Bacteroides fragilis* is associated with early-stage  
880 colorectal neoplasia. *PLoS One* *12*, e0171602.

- 881 47. Haghi, F., Goli, E., Mirzaei, B., and Zeighami, H. (2019). The association between fecal  
882 enterotoxigenic *B. fragilis* with colorectal cancer. *BMC Cancer* *19*, 879.
- 883 48. Feng, Q., Liang, S., Jia, H., Stadlmayr, A., Tang, L., Lan, Z., Zhang, D., Xia, H., Xu, X.,  
884 Jie, Z., et al. (2015). Gut microbiome development along the colorectal adenoma–carcinoma  
885 sequence. *Nat. Commun.* *6*, 1–13.
- 886 49. David, L.A., Weil, A., Ryan, E.T., Calderwood, S.B., Harris, J.B., Chowdhury, F., Begum,  
887 Y., Qadri, F., LaRocque, R.C., and Turnbaugh, P.J. (2015). Gut microbial succession  
888 follows acute secretory diarrhea in humans. *MBio* *6*, e00381–15.
- 889 50. Raymond, F., Ouameur, A.A., Déraspe, M., Iqbal, N., Gingras, H., Dridi, B., Leprohon, P.,  
890 Plante, P.-L., Giroux, R., Bérubé, È., et al. (2015). The initial state of the human gut  
891 microbiome determines its reshaping by antibiotics. *ISME J.* *10*, 707–720.
- 892 51. Qin, J., Li, Y., Cai, Z., Li, S., Zhu, J., Zhang, F., Liang, S., Zhang, W., Guan, Y., Shen, D.,  
893 et al. (2012). A metagenome-wide association study of gut microbiota in type 2 diabetes.  
894 *Nature* *490*, 55–60.
- 895 52. Wen, C., Zheng, Z., Shao, T., Liu, L., Xie, Z., Le Chatelier, E., He, Z., Zhong, W., Fan, Y.,  
896 Zhang, L., et al. (2017). Quantitative metagenomics reveals unique gut microbiome  
897 biomarkers in ankylosing spondylitis. *Genome Biol.* *18*, 1–13.
- 898 53. Le Chatelier, E., Nielsen, T., Qin, J., Prifti, E., Hildebrand, F., Falony, G., Almeida, M.,  
899 Arumugam, M., Batto, J.-M., Kennedy, S., et al. (2013). Richness of human gut  
900 microbiome correlates with metabolic markers. *Nature* *500*, 541–546.
- 901 54. Shotgun Metagenomics of 250 Adult Twins Reveals Genetic and Environmental Impacts on  
902 the Gut Microbiome (2016). *Cell Systems* *3*, 572–584.e3.
- 903 55. Extensive Unexplored Human Microbiome Diversity Revealed by Over 150,000 Genomes  
904 from Metagenomes Spanning Age, Geography, and Lifestyle (2019). *Cell* *176*, 649–  
905 662.e20.
- 906 56. Brito, I.L., Yilmaz, S., Huang, K., Xu, L., Jupiter, S.D., Jenkins, A.P., Naisilisili, W.,  
907 Tamminen, M., Smillie, C.S., Wortman, J.R., et al. (2016). Mobile genes in the human  
908 microbiome are structured from global to individual scales. *Nature* *535*, 435–439.
- 909 57. Strain-Level Analysis of Mother-to-Child Bacterial Transmission during the First Few  
910 Months of Life (2018). *Cell Host Microbe* *24*, 146–154.e4.
- 911 58. Dhakan, D.B., Maji, A., Sharma, A.K., Saxena, R., Pulikkan, J., Grace, T., Gomez, A.,  
912 Scaria, J., Amato, K.R., and Sharma, V.K. (2019). The unique composition of Indian gut  
913 microbiome, gene catalogue, and associated fecal metabolome deciphered using multi-  
914 omics approaches. *Gigascience* *8*, giz004.
- 915 59. Personalized Nutrition by Prediction of Glycemic Responses (2015). *Cell* *163*, 1079–1094.

- 916 60. Ferretti, P., Pasolli, E., Tett, A., Asnicar, F., Gorfer, V., Fedi, S., Armanini, F., Truong,  
917 D.T., Manara, S., Zolfo, M., et al. (2018). Mother-to-Infant Microbial Transmission from  
918 Different Body Sites Shapes the Developing Infant Gut Microbiome. *Cell Host Microbe* 24,  
919 133.
- 920 61. Metagenome Sequencing of the Hadza Hunter-Gatherer Gut Microbiota (2015). *Curr. Biol.*  
921 25, 1682–1693.
- 922 62. Yachida, S., Mizutani, S., Shiroma, H., Shiba, S., Nakajima, T., Sakamoto, T., Watanabe,  
923 H., Masuda, K., Nishimoto, Y., Kubo, M., et al. (2019). Metagenomic and metabolomic  
924 analyses reveal distinct stage-specific phenotypes of the gut microbiota in colorectal cancer.  
925 *Nat. Med.* 25, 968–976.
- 926 63. Kim, C.Y., Lee, M., Yang, S., Kim, K., Yong, D., Kim, H.R., and Lee, I. (2021). Human  
927 reference gut microbiome catalog including newly assembled genomes from under-  
928 represented Asian metagenomes. *Genome Med.* 13, 134.
- 929 64. Liu, W., Zhang, J., Wu, C., Cai, S., Huang, W., Chen, J., Xi, X., Liang, Z., Hou, Q., Zhou,  
930 B., et al. (2016). Unique Features of Ethnic Mongolian Gut Microbiome revealed by  
931 metagenomic analysis. *Sci. Rep.* 6, 1–13.
- 932 65. Zhernakova, A., Kurilshikov, A., Bonder, M.J., Tigchelaar, E.F., Schirmer, M., Vatanen, T.,  
933 Mujagic, Z., Vila, A.V., Falony, G., Vieira-Silva, S., et al. (2016). Population-based  
934 metagenomics analysis reveals markers for gut microbiome composition and diversity.  
935 *Science* 352, 565–569.
- 936 66. Obregon-Tito, A.J., Tito, R.Y., Metcalf, J., Sankaranarayanan, K., Clemente, J.C., Ursell,  
937 L.K., Zech Xu, Z., Van Treuren, W., Knight, R., Gaffney, P.M., et al. (2015). Subsistence  
938 strategies in traditional societies distinguish gut microbiomes. *Nat. Commun.* 6, 1–9.
- 939 67. Li, J., Jia, H., Cai, X., Zhong, H., Feng, Q., Sunagawa, S., Arumugam, M., Kultima, J.R.,  
940 Prifti, E., Nielsen, T., et al. (2014). An integrated catalog of reference genes in the human  
941 gut microbiome. *Nat. Biotechnol.* 32, 834–841.
- 942 68. Dynamics and Stabilization of the Human Gut Microbiome during the First Year of Life  
943 (2015). *Cell Host Microbe* 17, 690–703.
- 944 69. Lou, Y.C., Olm, M.R., Diamond, S., Crits-Christoph, A., Firek, B.A., Baker, R., Morowitz,  
945 M.J., and Banfield, J.F. (2021). Infant gut strain persistence is associated with maternal  
946 origin, phylogeny, and traits including surface adhesion and iron acquisition. *Cell Reports*  
947 *Medicine* 2. 10.1016/j.xcrm.2021.100393.
- 948 70. A framework for human microbiome research (2012). *Nature* 486, 215–221.
- 949 71. Gupta, V.K., Paul, S., and Dutta, C. (2017). Geography, Ethnicity or Subsistence-Specific  
950 Variations in Human Microbiome Composition and Diversity. *Frontiers in Microbiology* 8.  
951 10.3389/fmicb.2017.01162.

- 952 72. Yutin, N., Makarova, K.S., Gussow, A.B., Krupovic, M., Segall, A., Edwards, R.A., and  
953 Koonin, E.V. (2018). Discovery of an expansive bacteriophage family that includes the  
954 most abundant viruses from the human gut. *Nat Microbiol* 3, 38–46.
- 955 73. Amato, K.R., Yeoman, C.J., Kent, A., Righini, N., Carbonero, F., Estrada, A., Rex Gaskins,  
956 H., Stumpf, R.M., Yildirim, S., Torralba, M., et al. (2013). Habitat degradation impacts  
957 black howler monkey (*Alouatta pigra*) gastrointestinal microbiomes. *ISME J.* 7, 1344–1353.
- 958 74. Iino, T., Mori, K., Itoh, T., Kudo, T., Suzuki, K.-I., and Ohkuma, M. (2014). Description of  
959 *Mariniphaga anaerophila* gen. nov., sp. nov., a facultatively aerobic marine bacterium  
960 isolated from tidal flat sediment, reclassification of the *Draconibacteriaceae* as a later  
961 heterotypic synonym of the *Prolixibacteraceae* and description of the family *Marinifilaceae*  
962 fam. nov. *Int. J. Syst. Evol. Microbiol.* 64, 3660–3667.
- 963 75. Sunagawa, S., Coelho, L.P., Chaffron, S., Kultima, J.R., Labadie, K., Salazar, G.,  
964 Djahanschiri, B., Zeller, G., Mende, D.R., Alberti, A., et al. (2015). Ocean plankton.  
965 Structure and function of the global ocean microbiome. *Science* 348, 1261359.
- 966 76. Kopf, A., Bicak, M., Kottmann, R., Schnetzer, J., Kostadinov, I., Lehmann, K., Fernandez-  
967 Guerra, A., Jeanthon, C., Rahav, E., Ullrich, M., et al. (2015). The ocean sampling day  
968 consortium. *Gigascience* 4, 27.
- 969 77. Coelho, L.P., Kultima, J.R., Costea, P.I., Fournier, C., Pan, Y., Czarnecki-Maulden, G.,  
970 Hayward, M.R., Forslund, S.K., Schmidt, T.S.B., Descombes, P., et al. (2018). Similarity of  
971 the dog and human gut microbiomes in gene content and response to diet. *Microbiome* 6, 1–  
972 11.
- 973 78. Hendriksen, R.S., Munk, P., Njage, P., van Bunnik, B., McNally, L., Lukjancenko, O.,  
974 Röder, T., Nieuwenhuijse, D., Pedersen, S.K., Kjeldgaard, J., et al. (2019). Global  
975 monitoring of antimicrobial resistance based on metagenomics analyses of urban sewage.  
976 *Nat. Commun.* 10, 1–12.
- 977 79. Feng, S., Bootsma, M., and McLellan, S.L. (2018). Human-Associated Lachnospiraceae  
978 Genetic Markers Improve Detection of Fecal Pollution Sources in Urban Waters. *Appl.*  
979 *Environ. Microbiol.* 84. 10.1128/AEM.00309-18.
- 980 80. Sauer, E.P., Vandewalle, J.L., Bootsma, M.J., and McLellan, S.L. (2011). Detection of the  
981 human specific *Bacteroides* genetic marker provides evidence of widespread sewage  
982 contamination of stormwater in the urban environment. *Water Res.* 45, 4081–4091.
- 983 81. Pluta, R., Boer, D.R., Lorenzo-Díaz, F., Russi, S., Gómez, H., Fernández-López, C., Pérez-  
984 Luque, R., Orozco, M., Espinosa, M., and Coll, M. (2017). Structural basis of a histidine-  
985 DNA nicking/joining mechanism for gene transfer and promiscuous spread of antibiotic  
986 resistance. *Proc. Natl. Acad. Sci. U. S. A.* 114, E6526–E6535.
- 987 82. Delmont, T.O., Kiefl, E., Kilinc, O., Esen, O.C., Uysal, I., Rappé, M.S., Giovannoni, S., and  
988 Eren, A.M. (2019). Single-amino acid variants reveal evolutionary processes that shape the  
989 biogeography of a global SAR11 subclade. *Elife* 8. 10.7554/eLife.46497.

- 990 83. Mirdita, M., Schütze, K., Moriwaki, Y., Heo, L., Ovchinnikov, S., and Steinegger, M.  
991 (2022). ColabFold: making protein folding accessible to all. *Nat. Methods* *19*, 679–682.
- 992 84. Kiefl, E., Esen, O.C., Miller, S.E., Kroll, K.L., Willis, A.D., Rappé, M.S., Pan, T., and Eren,  
993 A.M. (2023). Structure-informed microbial population genetics elucidate selective pressures  
994 that shape protein evolution. *Sci Adv* *9*, eabq4632.
- 995 85. Lu, Y.B., Datta, H.J., and Bastia, D. (1998). Mechanistic studies of initiator-initiator  
996 interaction and replication initiation. *EMBO J.* *17*, 5192–5200.
- 997 86. Debray, R., Herbert, R.A., Jaffe, A.L., Crits-Christoph, A., Power, M.E., and Koskella, B.  
998 (2021). Priority effects in microbiome assembly. *Nat. Rev. Microbiol.* *20*, 109–121.
- 999 87. Vatanen, T., Jabbar, K.S., Ruohtula, T., Honkanen, J., Avila-Pacheco, J., Siljander, H.,  
1000 Stražar, M., Oikarinen, S., Hyöty, H., Ilonen, J., et al. (2022). Mobile genetic elements from  
1001 the maternal microbiome shape infant gut microbial assembly and metabolism. *Cell* *185*,  
1002 4921–4936.e15.
- 1003 88. Joo, J., Gunny, M., Cases, M., Hudson, P., Albert, R., and Harvill, E. (2006).  
1004 Bacteriophage-mediated competition in *Bordetella* bacteria. *Proc. Biol. Sci.* *273*, 1843–  
1005 1848.
- 1006 89. Bondy-Denomy, J., Qian, J., Westra, E.R., Buckling, A., Guttman, D.S., Davidson, A.R.,  
1007 and Maxwell, K.L. (2016). Prophages mediate defense against phage infection through  
1008 diverse mechanisms. *ISME J.* *10*, 2854–2866.
- 1009 90. Mavrich, T.N., and Hatfull, G.F. (2019). Evolution of Superinfection Immunity in Cluster A  
1010 Mycobacteriophages. *mBio* *10*. 10.1128/mbio.00971-19.
- 1011 91. Chen, B., Chen, Z., Wang, Y., Gong, H., Sima, L., Wang, J., Ouyang, S., Gan, W.,  
1012 Krupovic, M., Chen, X., et al. (2020). ORF4 of the Temperate Archaeal Virus SNJ1  
1013 Governs the Lysis-Lysogeny Switch and Superinfection Immunity. *J. Virol.* *94*.  
1014 10.1128/JVI.00841-20.
- 1015 92. Beaber, J.W., Hochhut, B., and Waldor, M.K. (2004). SOS response promotes horizontal  
1016 dissemination of antibiotic resistance genes. *Nature* *427*, 72–74.
- 1017 93. Comeau, A.M., Tétart, F., Trojet, S.N., Prère, M.-F., and Krisch, H.M. (2007). Phage-  
1018 Antibiotic Synergy (PAS):  $\beta$ -Lactam and Quinolone Antibiotics Stimulate Virulent Phage  
1019 Growth. *PLoS One* *2*, e799.
- 1020 94. Ubeda, C., Maiques, E., Knecht, E., Lasa, I., Novick, R.P., and Penadés, J.R. (2005).  
1021 Antibiotic-induced SOS response promotes horizontal dissemination of pathogenicity  
1022 island-encoded virulence factors in staphylococci. *Mol. Microbiol.* *56*, 836–844.
- 1023 95. Schumann, J.P., Jones, D.T., and Woods, D.R. (1984). Induction of proteins during phage  
1024 reactivation induced by UV irradiation, oxygen and peroxide in *Bacteroides fragilis*. *FEMS*  
1025 *Microbiol. Lett.* *23*, 131–135.

- 1026 96. Sund, C.J., Rocha, E.R., Tzianabos, A.O., Wells, W.G., Gee, J.M., Reott, M.A., O'Rourke,  
1027 D.P., and Smith, C.J. (2008). The *Bacteroides fragilis* transcriptome response to oxygen and  
1028 H<sub>2</sub>O<sub>2</sub>: the role of OxyR and its effect on survival and virulence. *Mol. Microbiol.* *67*, 129–  
1029 142.
- 1030 97. Vineis, J.H., Ringus, D.L., Morrison, H.G., Delmont, T.O., Dalal, S., Raffals, L.H.,  
1031 Antonopoulos, D.A., Rubin, D.T., Eren, A.M., Chang, E.B., et al. (2016). Patient-Specific  
1032 *Bacteroides* Genome Variants in Pouchitis. *MBio* *7*. 10.1128/mBio.01713-16.
- 1033 98. Baumgart, D.C., and Carding, S.R. (2007). Inflammatory bowel disease: cause and  
1034 immunobiology. *Lancet* *369*, 1627–1640.
- 1035 99. Graham, D.B., and Xavier, R.J. (2020). Pathway paradigms revealed from the genetics of  
1036 inflammatory bowel disease. *Nature* *578*, 527–539.
- 1037 100. McLellan, S.L., and Eren, A.M. (2014). Discovering new indicators of fecal pollution.  
1038 *Trends Microbiol.* *22*, 697–706.
- 1039 101. Neu, A.T., Allen, E.E., and Roy, K. (2021). Defining and quantifying the core microbiome:  
1040 Challenges and prospects. *Proc. Natl. Acad. Sci. U. S. A.* *118*. 10.1073/pnas.2104429118.
- 1041 102. Aguirre de Cárcer, D. (2018). The human gut pan-microbiome presents a compositional  
1042 core formed by discrete phylogenetic units. *Sci. Rep.* *8*, 14069.
- 1043 103. Mancabelli, L., Milani, C., Lugli, G.A., Turrone, F., Ferrario, C., van Sinderen, D., and  
1044 Ventura, M. (2017). Meta-analysis of the human gut microbiome from urbanized and pre-  
1045 agricultural populations. *Environ. Microbiol.* *19*, 1379–1390.
- 1046 104. Shetty, S.A., Kuipers, B., Atashgahi, S., Aalvink, S., Smidt, H., and de Vos, W.M. (2022).  
1047 Inter-species Metabolic Interactions in an In-vitro Minimal Human Gut Microbiome of  
1048 Core Bacteria. *npj Biofilms and Microbiomes* *8*. 10.1038/s41522-022-00275-2.
- 1049 105. Nash, A.K., Auchtung, T.A., Wong, M.C., Smith, D.P., Gesell, J.R., Ross, M.C., Stewart,  
1050 C.J., Metcalf, G.A., Muzny, D.M., Gibbs, R.A., et al. (2017). The gut mycobiome of the  
1051 Human Microbiome Project healthy cohort. *Microbiome* *5*, 153.
- 1052 106. Eren, A.M., Murat Eren, A., Kiefl, E., Shaiber, A., Veseli, I., Miller, S.E., Schechter, M.S.,  
1053 Fink, I., Pan, J.N., Yousef, M., et al. (2020). Community-led, integrated, reproducible multi-  
1054 omics with anvi'o. *Nature Microbiology* *6*, 3–6. 10.1038/s41564-020-00834-3.
- 1055 107. Shaiber, A., Willis, A.D., Delmont, T.O., Roux, S., Chen, L.-X., Schmid, A.C., Yousef, M.,  
1056 Watson, A.R., Lolans, K., Esen, Ö.C., et al. (2020). Functional and genetic markers of niche  
1057 partitioning among enigmatic members of the human oral microbiome. *Genome Biol.* *21*,  
1058 1–35.
- 1059 108. Köster, J., and Rahmann, S. (2012). Snakemake--a scalable bioinformatics workflow  
1060 engine. *Bioinformatics* *28*, 2520–2522.

- 1061 109. Eren, A.M., Vineis, J.H., Morrison, H.G., and Sogin, M.L. (2013). A filtering method to  
1062 generate high quality short reads using illumina paired-end technology. *PLoS One* 8,  
1063 e66643.
- 1064 110. Peng, Y., Leung, H.C.M., Yiu, S.M., and Chin, F.Y.L. (2012). IDBA-UD: a *de novo*  
1065 assembler for single-cell and metagenomic sequencing data with highly uneven depth.  
1066 *Bioinformatics* 28, 1420–1428. 10.1093/bioinformatics/bts174.
- 1067 111. Langmead, B., and Salzberg, S.L. (2012). Fast gapped-read alignment with Bowtie 2. *Nat.*  
1068 *Methods* 9, 357–359.
- 1069 112. Li, H., Handsaker, B., Wysoker, A., Fennell, T., Ruan, J., Homer, N., Marth, G., Abecasis,  
1070 G., Durbin, R., and 1000 Genome Project Data Processing Subgroup (2009). The Sequence  
1071 Alignment/Map format and SAMtools. *Bioinformatics* 25, 2078–2079.
- 1072 113. Hyatt, D., Chen, G.-L., Locascio, P.F., Land, M.L., Larimer, F.W., and Hauser, L.J. (2010).  
1073 Prodigal: prokaryotic gene recognition and translation initiation site identification. *BMC*  
1074 *Bioinformatics* 11, 119.
- 1075 114. Utter, D.R., Borisy, G.G., Eren, A.M., Cavanaugh, C.M., and Mark Welch, J.L. (2020).  
1076 Metapangenomics of the oral microbiome provides insights into habitat adaptation and  
1077 cultivar diversity. *Genome Biol.* 21, 293.
- 1078 115. García-Bayona, L., and Comstock, L.E. (2019). Streamlined Genetic Manipulation of  
1079 Diverse *Bacteroides* and *Parabacteroides* Isolates from the Human Gut Microbiota. *MBio*  
1080 10. 10.1128/mBio.01762-19.
- 1081 116. Zitomersky, N.L., Coyne, M.J., and Comstock, L.E. (2011). Longitudinal Analysis of the  
1082 Prevalence, Maintenance, and IgA Response to Species of the Order *Bacteroidales* in the  
1083 Human Gut. *Infect. Immun.* 79, 2012.
- 1084 117. Evans, J.C., McEneaney, V.L., Coyne, M.J., Caldwell, E.P., Sheahan, M.L., Von, S.S.,  
1085 Coyne, E.M., Tweten, R.K., and Comstock, L.E. (2022). A proteolytically activated  
1086 antimicrobial toxin encoded on a mobile plasmid of *Bacteroidales* induces a protective  
1087 response. *Nat. Commun.* 13. 10.1038/s41467-022-31925-w.
- 1088 118. Pluta, R., Boer, D.R., and Coll, M. (2014). MobM Relaxase Domain (MOBV; Mob\_Pre)  
1089 bound to plasmid pMV158 oriT DNA (22nt). Mn-bound crystal structure at pH 4.6.  
1090 10.2210/pdb4lvi/pdb.
- 1091 119. Delano, W.L. (2002). The PyMOL molecular graphics system. <http://www.pymol.org/>.
- 1092 120. Ben Chorin, A., Masrati, G., Kessel, A., Narunsky, A., Sprinzak, J., Lahav, S., Ashkenazy,  
1093 H., and Ben-Tal, N. (2020). ConSurf-DB: An accessible repository for the evolutionary  
1094 conservation patterns of the majority of PDB proteins. *Protein Sci.* 29, 258–267.
- 1095 121. Goldenberg, O., Erez, E., Nimrod, G., and Ben-Tal, N. (2009). The ConSurf-DB: pre-  
1096 calculated evolutionary conservation profiles of protein structures. *Nucleic Acids Res.* 37,



- 1097 D323–D327.
- 1098 122. Altschul, S.F., Gish, W., Miller, W., Myers, E.W., and Lipman, D.J. (1990). Basic local  
1099 alignment search tool. *J. Mol. Biol.* *215*. 10.1016/S0022-2836(05)80360-2.
- 1100 123. Edgar, R.C. (2004). MUSCLE: a multiple sequence alignment method with reduced time  
1101 and space complexity. *BMC Bioinformatics* *5*, 113.
- 1102 124. Capella-Gutiérrez, S., Silla-Martínez, J.M., and Gabaldón, T. (2009). trimAl: a tool for  
1103 automated alignment trimming in large-scale phylogenetic analyses. *Bioinformatics* *25*,  
1104 1972–1973.
- 1105 125. Nguyen, L.-T., Schmidt, H.A., von Haeseler, A., and Minh, B.Q. (2015). IQ-TREE: a fast  
1106 and effective stochastic algorithm for estimating maximum-likelihood phylogenies. *Mol.*  
1107 *Biol. Evol.* *32*, 268–274.
- 1108 126. Bastian, M., Heymann, S., and Jacomy, M. (2009). Gephi: An Open Source Software for  
1109 Exploring and Manipulating Networks. *ICWSM* *3*, 361–362.
- 1110 127. Jacomy, M., Venturini, T., Heymann, S., and Bastian, M. (2014). ForceAtlas2, a continuous  
1111 graph layout algorithm for handy network visualization designed for the Gephi software.  
1112 *PLoS One* *9*, e98679.
- 1113 128. Wood, D.E., Lu, J., and Langmead, B. (2019). Improved metagenomic analysis with Kraken  
1114 2. *Genome Biol.* *20*, 257.
- 1115 129. Chen, Y.T., Williamson, B.D., Okonek, T., Wolock, C.J., Spieker, A.J., Hee Wai, T.Y.,  
1116 Hughes, J.P., Emerson, S.S., and Willis, A.D. (2022). rigr: Regression, Inference, and  
1117 General Data Analysis Tools in R. *Journal of Open Source Software* *7*, 4847.  
1118 10.21105/joss.04847.
- 1119 130. Conrad, S., Oethinger, M., Kaifel, K., Klotz, G., Marre, R., and Kern, W.V. (1996). gyrA  
1120 mutations in high-level fluoroquinolone-resistant clinical isolates of *Escherichia coli*. *J.*  
1121 *Antimicrob. Chemother.* *38*, 443–455.
- 1122 131. Lee, C., Kim, J., Shin, S.G., and Hwang, S. (2006). Absolute and relative QPCR  
1123 quantification of plasmid copy number in *Escherichia coli*. *Journal of Biotechnology* *123*,  
1124 273–280. 10.1016/j.jbiotec.2005.11.014.
- 1125 132. Olds, H.T., Corsi, S.R., Dila, D.K., Halmo, K.M., Bootsma, M.J., and McLellan, S.L.  
1126 (2018). High levels of sewage contamination released from urban areas after storm events:  
1127 A quantitative survey with sewage specific bacterial indicators. *PLoS Med.* *15*, e1002614.
- 1128 133. Feng, S., Ahmed, W., and McLellan, S.L. (2020). Ecological and Technical Mechanisms for  
1129 Cross-Reaction of Human Fecal Indicators with Animal Hosts. *Appl. Environ. Microbiol.*  
1130 *86*. 10.1128/AEM.02319-19.
- 1131 134. Lenaker, P.L., Corsi, S.R., McLellan, S.L., Borchardt, M.A., Olds, H.T., Dila, D.K.,

- 1132 Spencer, S.K., and Baldwin, A.K. (2018). Human-Associated Indicator Bacteria and  
1133 Human-Specific Viruses in Surface Water: A Spatial Assessment with Implications on Fate  
1134 and Transport. *Environ. Sci. Technol.* *52*, 12162–12171.
- 1135 135. Corsi, S.R., De Cicco, L.A., Hansen, A.M., Lenaker, P.L., Bergamaschi, B.A., Pellerin,  
1136 B.A., Dila, D.K., Bootsma, M.J., Spencer, S.K., Borchardt, M.A., et al. (2021). Optical  
1137 Properties of Water for Prediction of Wastewater Contamination, Human-Associated  
1138 Bacteria, and Fecal Indicator Bacteria in Surface Water at Three Watershed Scales.  
1139 *Environ. Sci. Technol.* *55*, 13770–13782.
- 1140 136. USGS water data for the nation <https://waterdata.usgs.gov/nwis>.
- 1141 137. Dila, D.K., Koster, E.R., McClary-Guterriez, J., Khazaei, B., Bravo, H.R., Bootsma, M.J.,  
1142 and McLellan, S.L. (2022). Assessment of Regional and Local Sources of Contamination at  
1143 Urban Beaches Using Hydrodynamic Models and Field-Based Monitoring. *ACS EST Water*  
1144 *2*, 1715–1724.
- 1145 138. Wickham, H. (2016). *ggplot2: Elegant Graphics for Data Analysis* (Springer).
- 1146
- 1147

## 1148 Supplementary Tables

1149 **Supplementary Table 1:** The accompanying metadata for all publicly available metagenomes used in this  
1150 study. This table contains 3 tabs. **(1)** healthy\_gut: all healthy gut metagenomes. **(2)** IBD: all IBD gut  
1151 metagenomes. **(3)** alternative\_environment: all non-gut metagenomes.

1152 **Supplementary Table 2:** The nucleotide sequence and average nucleotide identity (ANI) calculations for  
1153 all pBI143 contigs. This table has 3 tabs. **(1)** pBI143\_sequences: the nucleotide sequence for the 3 reference  
1154 versions of pBI143 assembled from metagenomes. **(2)** ANI information for the 3 reference sequences of  
1155 pBI143. **(3)** additional\_genes: the nucleotide sequences for pBI143 assembled from metagenomes with  
1156 additional genetic material.

1157 **Supplementary Table 3:** Read recruitment data from metagenomes used in this study. This table has 4  
1158 tabs. **(1)** global adult gut metagenomes: coverage and detection data for the reference versions of pBI143  
1159 in global adult gut metagenomes **(2)** mother-infant metagenomes: coverage and detection data for the  
1160 reference versions of pBI143 in mother and infant metagenomes **(3)** crassphage\_comparison: coverage and  
1161 detection data for crassphage in global adult gut metagenomes. **(4)** alternative\_environments: coverage and  
1162 detection data for the reference versions of pBI143 in non-human gut environments.

1163 **Supplementary Table 4:** The metadata for the Duchossois Family Institute bacterial isolate genomes used  
1164 in this study.

1165 **Supplementary Table 5:** pBI143 copy number determination via qPCR. This table includes 2 tabs. **(1)** Seq  
1166 DataSource: contains the Gen-Bank accession numbers and other data sources used in primer and probe  
1167 development. **(2)** Hsp BLAST result: contains BLASTN results of the hsp nucleotide sequence against the  
1168 15 *Bacteroides fragilis* RefSeq complete genomes.

1169 **Supplementary Table 6:** The data for pBI143 copy number for all animal, environmental and sewage  
1170 samples as measured via qPCR. This table has 3 tabs. **(1)** animal\_copy\_number: contains the data showing  
1171 sample and copy number of pBI143 in animal fecal samples. **(2)** environmental\_copy\_number: contains the  
1172 data showing sample and copy number of pBI143 in water samples. **(3)** sewage\_copy\_number: contains  
1173 the data showing sample and copy number of pBI143 in sewage samples.

1174 **Supplementary Table 7:** All the data necessary for quantifying number and type of SNV in gut and sewage  
1175 metagenomes. Variability profiles are generated by anvio to describe the variation found across all contigs  
1176 of interest; for more information see <https://merenlab.org/2015/07/20/analyzing-variability/>. This table

1177 has 9 tabs. **(1)** `artificial_reads_var_profile`: The variability profile generated following artificial short read  
1178 generation and read recruitment of pBI143 Version 2 and 3 to Version 1 (see Methods). **(2)**  
1179 `global_mg_var_profiles`: The variability profile generated following read recruitment of all global gut  
1180 metagenomes to pBI143 Version 1. **(3)** `sewage_mg_var_profiles`: The variability profile generated  
1181 following read recruitment of all global sewage metagenomes to pBI143. **(4)** `matching_SNVs_gut`: The  
1182 number of SNVs that do or do not match one of the reference versions of pBI143 in global gut  
1183 metagenomes. **(5)** `matching_SNVs_sewage`: The number of SNVs that do or do not match one of the  
1184 reference versions of pBI143 in global sewage metagenomes. **(6)** `gut_var_profile_quince_mode`: This file  
1185 does not fit in excel. Link to online data to regenerate single nucleotide variant data at every position of  
1186 pBI143 across all global gut metagenomes (for more details on `quince-mode` see  
1187 <https://merenlab.org/2015/07/20/analyzing-variability/#parameters-to-refine-the-output>). **(7)**  
1188 `sewage_var_profile_quince_mode`: single nucleotide variant data at every position of pBI143 across all  
1189 global sewage metagenomes. **(8)** `gut_non-consensus_SNVs`: Data about the plasmid version and number  
1190 of non-consensus SNVs in each global gut metagenome. **(9)** `sewage_non-consensus_SNVs`: Data about  
1191 the plasmid version and number of non-consensus SNVs in each global sewage metagenome.

1192 **Supplementary Table 8:** This table contains SNV variability profiles for visualizing SAAVs on the  
1193 pBI143 AF structure. This table has 3 tabs: **(1)** `merged_variability`: contains all SNV variability data  
1194 calculated with `anvi-gen-variability-profile --engine AA` which summarized metagenomic read  
1195 recruitment results to pBI143; **(2)** `merged_variability_filtered`: filtered version of `merged_variability` that  
1196 reflects the SAAV data visualized on the pBI143 structure in **Fig. 3D**; **(3)** `most_prevalent_SAAVs`: this tab  
1197 contains a list of all SAAVs and their residue positions that are prevalent in at least 5% of samples.

1198 **Supplementary Table 9:** The necessary data to generate pBI143 and isolate genome phylogenies. This  
1199 table has 5 tabs. **(1)** `amino_acid_repA_mobA_concat`: the concatenated MobA and RepA sequences from  
1200 all 82 isolate genomes. Concatenated genes are separated by `XXX`. **(2)** `repA_mobA_treefile`: the treefile  
1201 generated from the concatenated mobA and repA sequences. **(3)** `amino_acid_SCG_concat`: the  
1202 concatenated ribosomal protein sequences from all 82 isolate genomes. Concatenated genes are separated  
1203 by `XXX`. **(4)** `SCG_treefile`: the treefile generated from the concatenated ribosomal protein sequences. **(5)**  
1204 `species_donor_information`: the associated isolate data that matches the donor, species and pBI143 version.

1205 **Supplementary Table 10:** The data necessary for generating and quantifying the mother-infant network  
1206 based on single nucleotide variants. This table has 8 tabs. **(1)** `FinalInd_variability_profile`: data for all single  
1207 nucleotide variants (SNVs) present in pBI143 in Finnish mother and infant metagenomes. **(2)**  
1208 `Sweden_variability_profile`: data for all single nucleotide variants present in pBI143 in Swedish mother and

1209 infant metagenomes. **(3)** Italy\_variability\_profile: data for all single nucleotide variants present in pBI143  
1210 in Italian mother and infant metagenomes. **(4)** USA\_variability\_profile: data for all single nucleotide  
1211 variants present in pBI143 in American mother and infant metagenomes. **(5)** network\_data: data used to  
1212 generate the network. **(6)** distance\_matrix\_cosine: distance matrix calculated from network data used for  
1213 quantification of distances between samples. **(7)** subtracted\_distance\_df: quantified distance between  
1214 mother and infant samples based on cosine distance matrix. **(8)** summary of pBI143 version maintenance  
1215 in infants over the sampling period.

1216 **Supplementary Table 11:** Kraken data. This table contains 2 tabs. **(1)** Kraken data for all *Bacteroides* (this  
1217 includes *Phocaeicola* with old *Bacteroides* genus names) and *Parabacteroides* taxa in global gut  
1218 metagenomes and the corresponding pBI143 coverage in each of these metagenomes. **(2)** Kraken data for  
1219 the number of reads recruited to a *B. fragilis* compared to the coverage of pBI143 in the same metagenomes.

1220 **Supplementary Table 12:** This table contains 2 tabs. **(1)** The data for the mouse competition experiments.  
1221 **(2)** The pBI143 maintenance in culture data.

1222 **Supplementary Table 13:** The data for pBI143 copy number for each timepoint and condition of the  
1223 *Bacteroides fragilis* stress experiments in culture as measured via qPCR. This table has 2 tabs. **(1)**  
1224 214\_oxidative\_stress\_qPCR\_data: contains data on the copy number for each test condition for the  
1225 *Bacteroides fragilis* 214 strain. **(2)** R16\_oxidative\_stress\_qPCR\_data: contains data on the copy number  
1226 for each test condition for the *Bacteroides fragilis* R16 strain.

1227 **Supplementary Table 14:** The calculated ACNR and necessary data for these calculations. This table has  
1228 4 tabs. **(1)** Coverage\_ratio\_data: the final ACNR for all predicted single hosts of pBI143 in metagenomes.  
1229 **(2)** pBI143\_healthy: the coverage of pBI143 in healthy gut metagenomes. **(3)** pBI143\_IBD: the coverage  
1230 of pBI143 in IBD gut metagenomes. **(4)** SCG\_taxonomy: Link to files containing SCG coverage data.

1231 **Supplementary Table 15:** The names and sequences of all primers and probes used in this study.

## 1232 Supplementary Figures

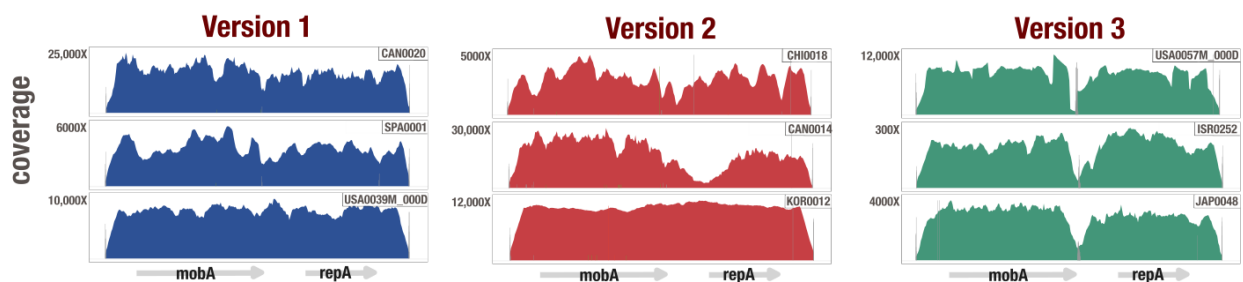

1233

1234

1235

1236

1237

1238

1239

**Supplementary Fig. 1. Representative coverage plots of global metagenomes mapped to pBI143.** Each coverage plot shows the read recruitment results for an individual metagenome to a pBI143 Version 1 (blue), Version 2 (red) and Version 3 (green). Vertical bars show single nucleotide variants (red bar = variant in first or second codon position, green bar = variant in third codon position, gray bar = intergenic variant). The x-axis is the pBI143 reference sequence. 3 coverage plots for each reference version of pBI143 are shown, the remaining 13,539 can be generated from the anvi'o databases at <https://merenlab.org/data/pBI143>.

1240

1241

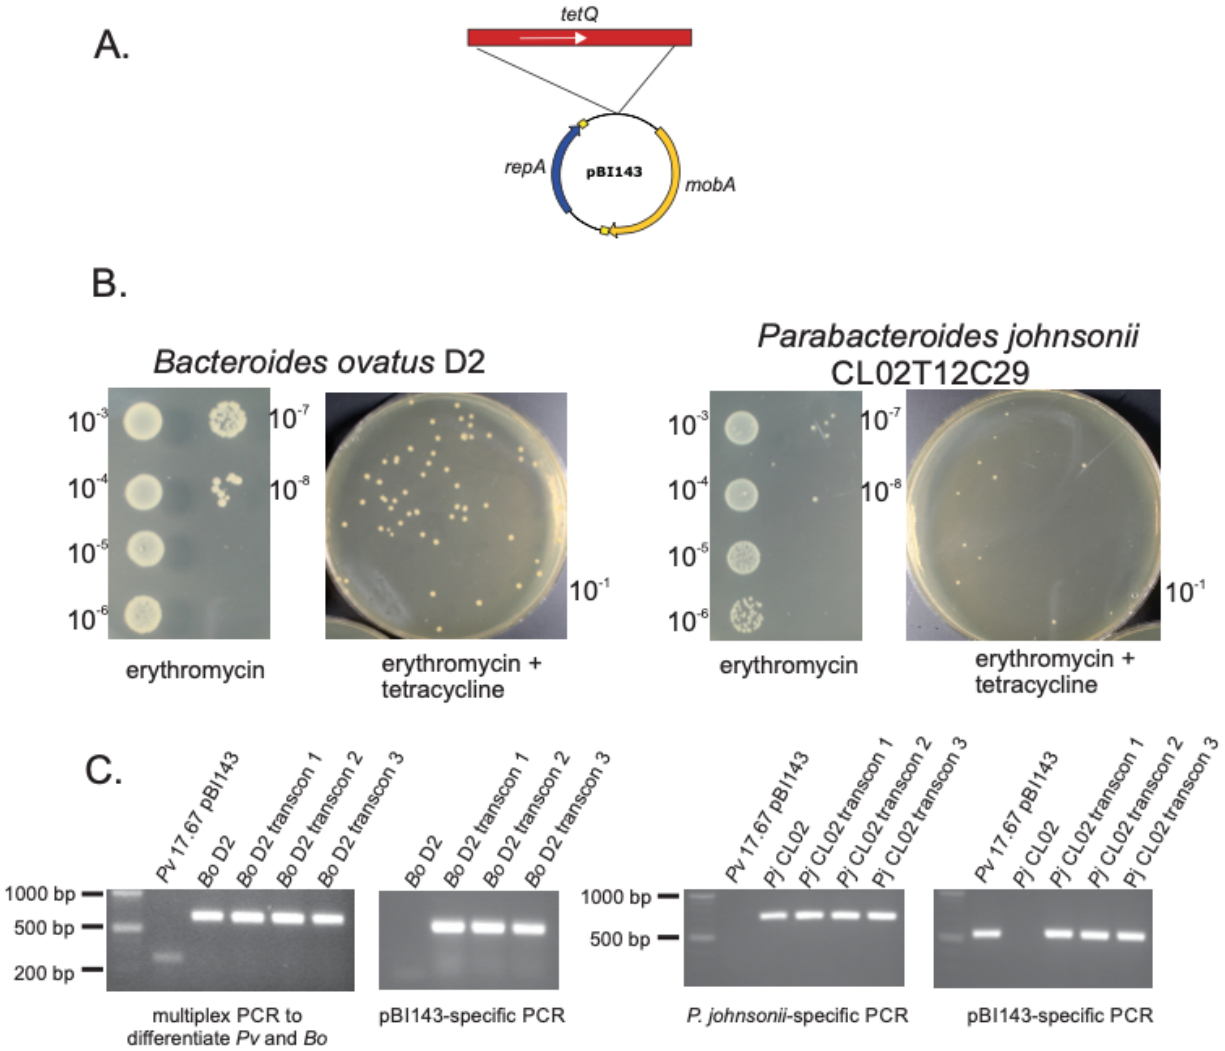

**Supplementary Fig. 2. pBI143 transfer to other Bacteroidales species.** (A) Construct made to select for plasmid transfer. (B) Number of recipients (erythromycin) and number of transconjugants (erythromycin and tetracycline) for transfer of pBI143-tetQ to *Bacteroides ovatus* D2 and *Parabacteroides johnsonii* CL02T12C29. (C) PCR to confirm presence of pBI143-tetQ in recipient strain.

# Version 1

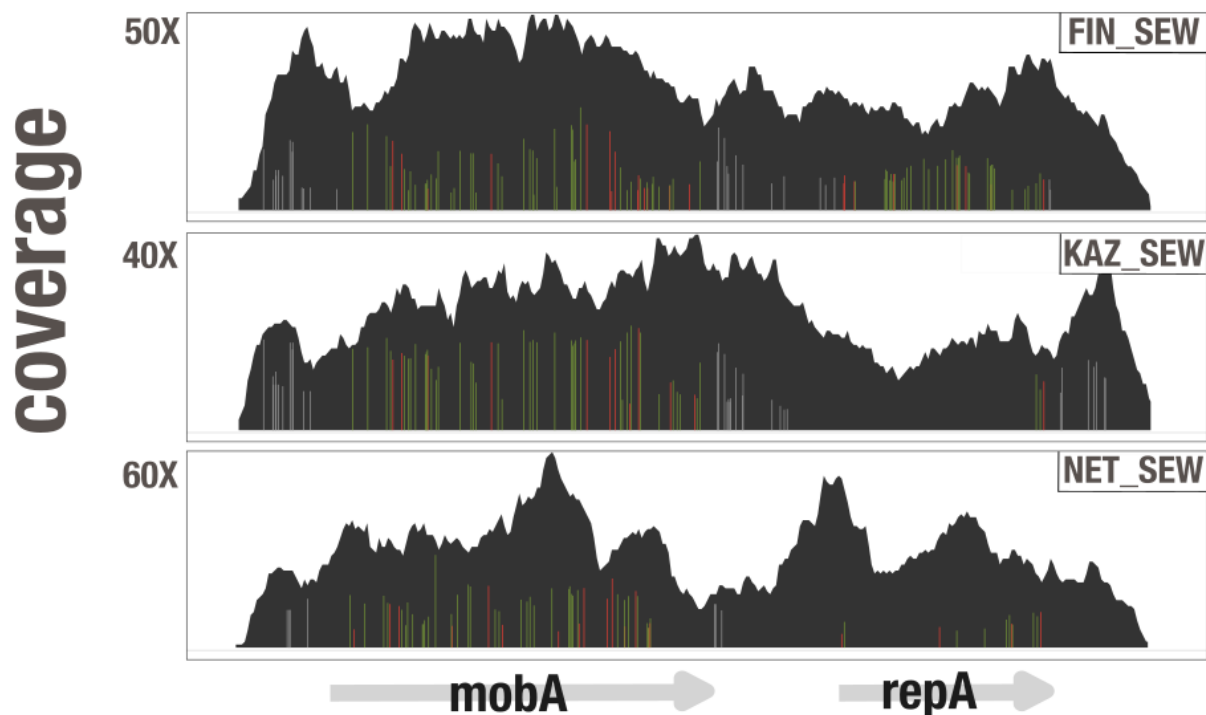

1248

1249

1250

1251

1252

1253

1254

1255

**Supplementary Fig. 3. Representative coverage plots of sewage metagenomes mapped to pBI143.** Each coverage plot shows the read recruitment results for a sewage metagenome to the Version 1 pBI143 reference sequence. Vertical bars show single nucleotide variants (red bar = variant in first or second codon position, green bar = variant in third codon position, gray bar = intergenic variant). The x-axis is the pBI143 reference sequence. 3 sewage coverage plots are shown, the other 435 coverage plots from all non-human environments can be generated from the anvi'o databases at <https://merenlab.org/data/pBI143>.



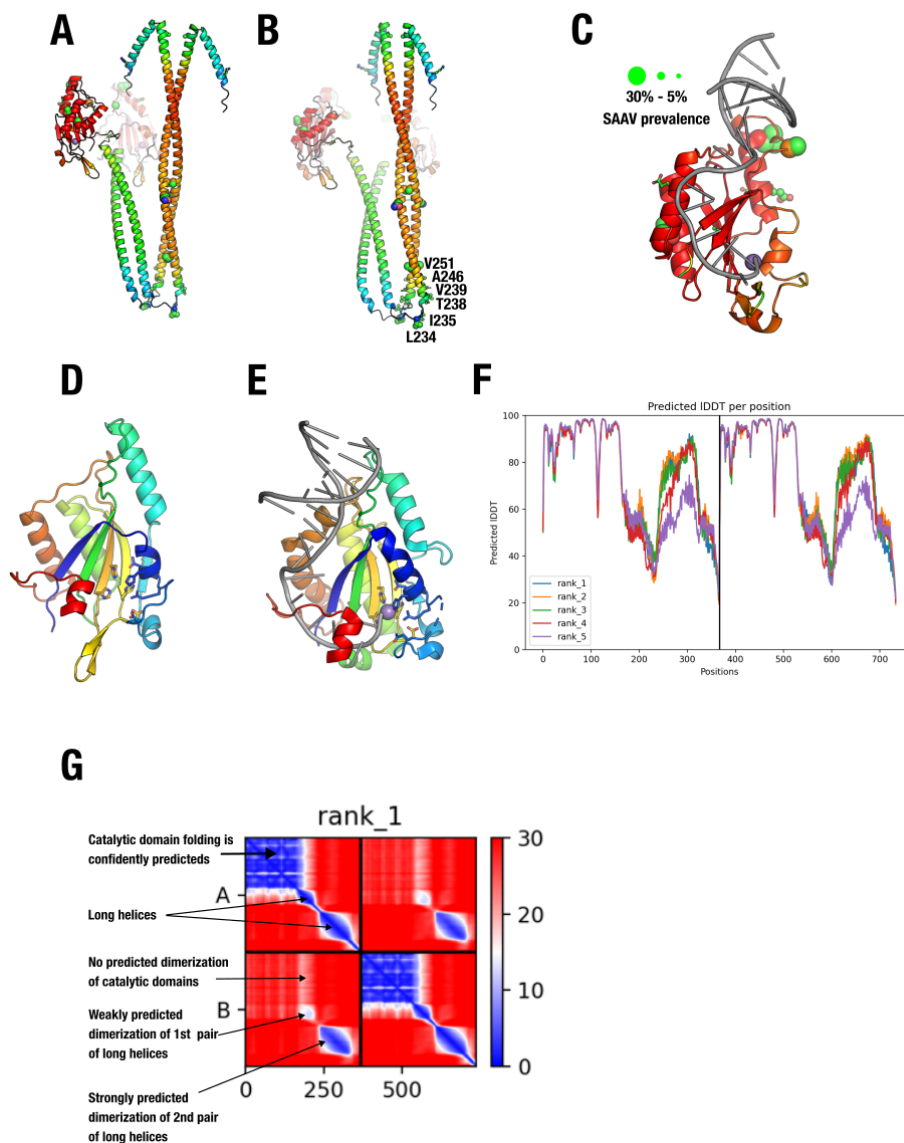

1256

1257

1258

1259

1260

1261

1262

1263

1264

1265

1266

1267

1268

1269

1270

**Supplementary Fig. 4. Insights from conserved single amino acid variants.** (A),(B) Different angles of the MobA AlphaFold 2 dimer prediction with single amino acid variants from all 4,516 human gut metagenomes superimposed as ball-and-stick residues. The size of the ball-and-stick spheres indicate the proportion of samples carrying variation in that position (the larger the sphere, the more prevalent the variation at the residue) and the color is in CPK format. The color of the ribbon diagram indicates the pLDDT from AlphaFold 2 (red > 90 pLDDT) and blue < 50 pLDDT). The purple sphere is the Mn<sup>++</sup> ion that marks the protein active site (oriT DNA and Mn<sup>2+</sup> from 4lvi.pdb; 10.1073/pnas.1702971114). (C) Catalytic domain with high pLDDT with single amino acid variants from all 4,516 human gut metagenomes superimposed as ball-and-stick residues. Size and coloring is the same as in A,B. (D) The catalytic domain of the AlphaFold 2 predicted MobA (residues 1-177) shown shaded from blue to red active site residues are shown as sticks. (E) MobM from pMV158 bound to oriT DNA (gray) and a catalytic Mn<sup>2+</sup> ion (purple) (PDB id 4lvi<sup>81</sup>) shown shaded from blue to red and active site residues are shown as sticks. (F) AlphaFold 2 pLDDT score representing structural prediction accuracy of MobA. (G) AlphaFold 2 predicted aligned error plot (PAE) for MobA dimer prediction.

1271

## Version 1

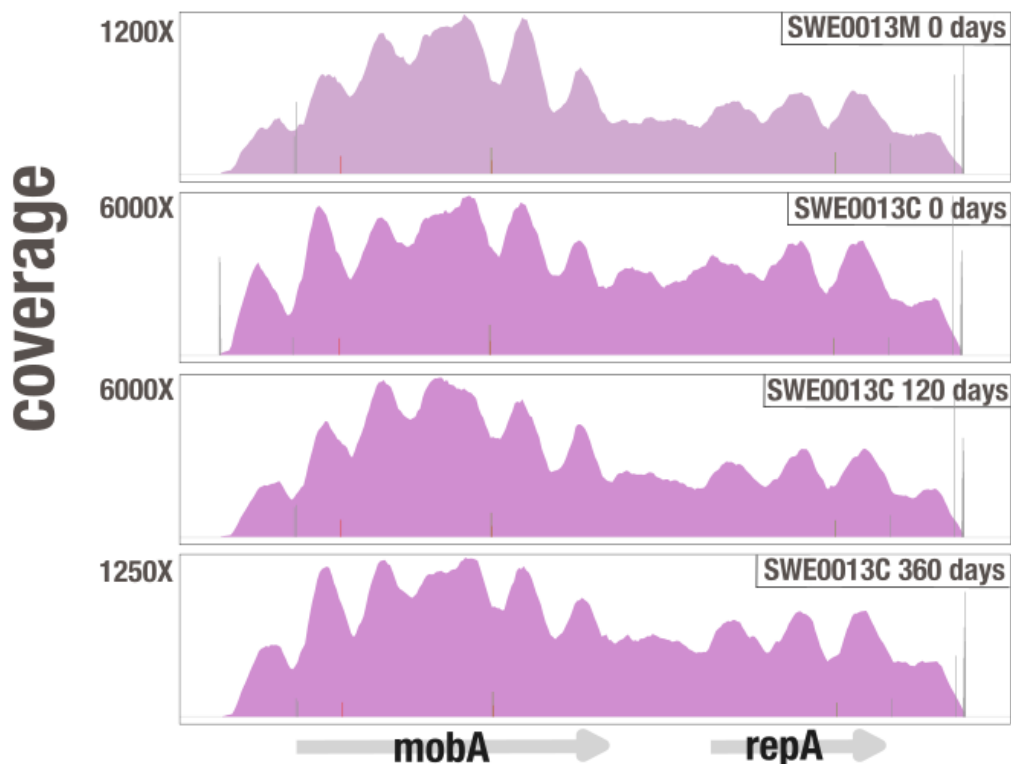

1272

1273

1274

1275

1276

1277

1278

**Supplementary Fig. 5. Representative mother-infant coverage plots.** Each coverage plot shows the read recruitment results for an individual metagenome to the Version 1 pBI143 reference sequence. Vertical bars show single nucleotide variants (red bar = variant in first or second codon position, green bar = variant in third codon position, gray bar = intergenic variant). The x-axis is the pBI143 reference sequence. 4 coverage plots are shown, the other 1,020 can be generated from the anvi'o databases at <https://merenlab.org/data/pBI143>.

1279

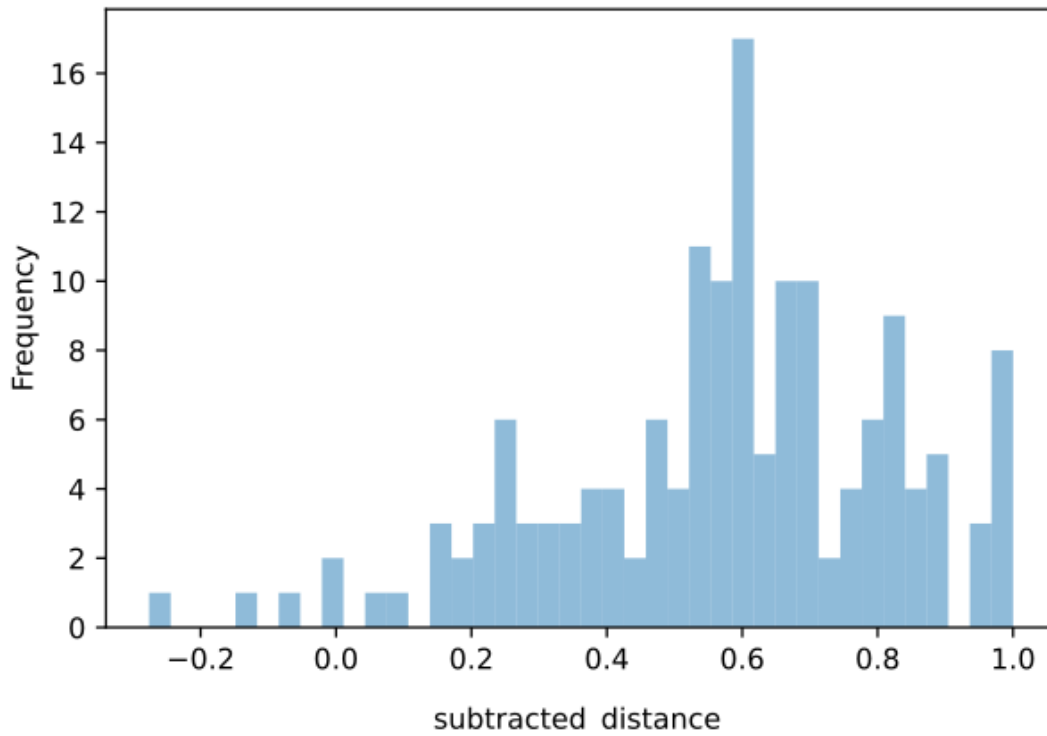

1280

1281

1282

1283

1284

1285

**Supplementary Fig. 6. Mother-infant network quantification.** Quantification of distances between samples in the network, where distance is calculated by converting the network file to a distance matrix using the python `pdist` function with cosine distances. The “subtracted difference” shows the mean within-family distances subtracted from mean between-family distances for each sample in the mother infant pair network. See methods for more details.

1286

1287

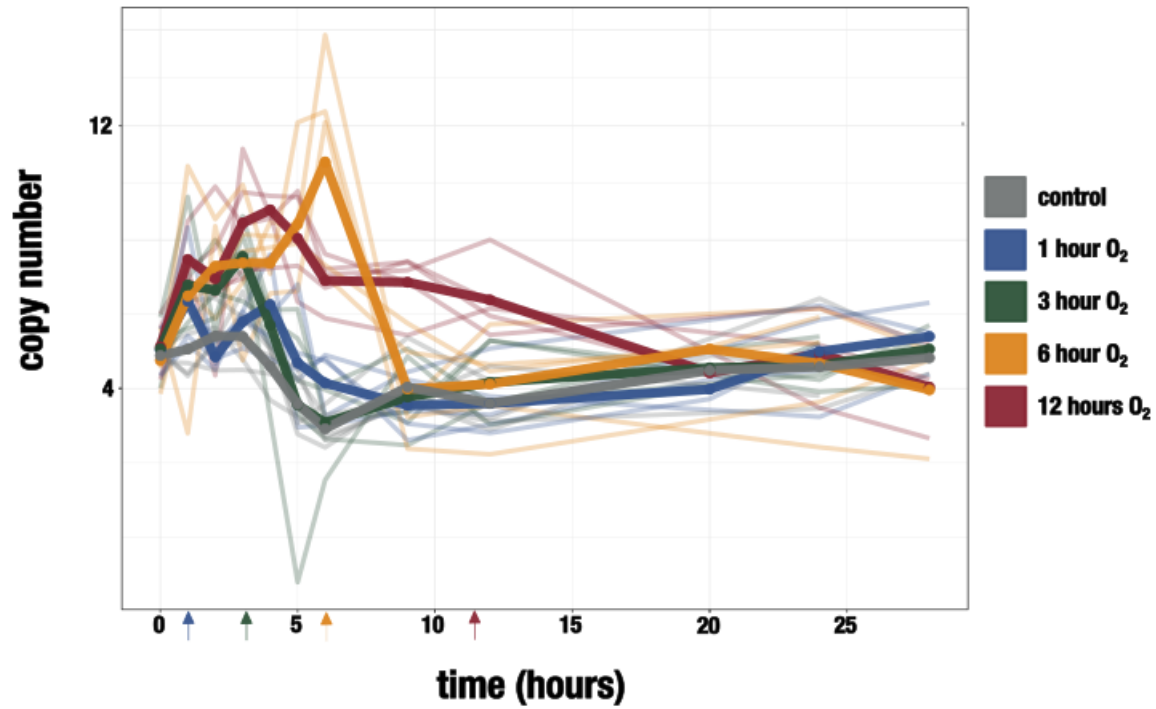

1288

1289

1290

1291

1292

1293

**Supplementary Fig. 7. R16 oxidative stress experiment.** Copy number of pBI143 in *B. fragilis* R16 cultures with increasing exposure to oxygen. Arrows indicate the time point at which the culture was returned to the anaerobic chamber. The control cultures (gray) were never exposed to oxygen. Opaque lines are the mean of 5 replicates (translucent lines).

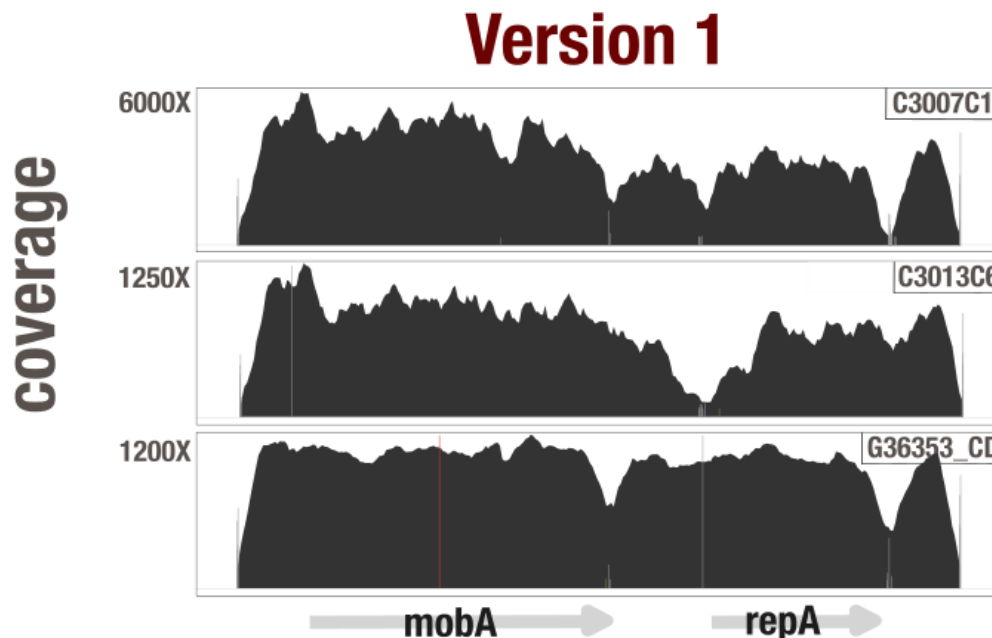

1294

1295

1296

1297

1298

1299

**Supplementary Fig. 8. Representative IBD gut metagenome coverage plots.** Each coverage plot shows the read recruitment results for an individual metagenome to a pBI143 Version 1. Vertical bars show single nucleotide variants (red bar = variant in first or second codon position, green bar = variant in third codon position, gray bar = intergenic variant). The x-axis is the pBI143 reference sequence. 3 coverage plots are shown, the other 3,087 can be generated from the anvi'o databases at <https://merenlab.org/data/pBI143>.

1300

## 1301           Supplementary Information

1302   The supplementary information file (available at [10.6084/m9.figshare.22336666](https://doi.org/10.6084/m9.figshare.22336666)) includes additional  
1303   information regarding the construction of the phylogenetic trees and plasmid constructs, the development  
1304   of the qPCR assay for determining copy number of pBI143, and additional information about the read  
1305   recruitment results of non-human gut environments to pBI143.
